# Supplementary material for: Risk of mortality with concomitant use of tamoxifen and selective serotonin reuptake inhibitors: multi-database cohort study
Source: PubMed Central journal article supplement — BMJ. 2016 Sep 30;354:i5014. doi: 10.1136/bmj.i5014 (PMC5044871; doi:10.1136/bmj.i5014), 2016-09-30
Supplement: donm032731.ww1_default.pdf [file donm032731.ww1_default.pdf]

**Appendix 1:** Supplementary material [posted as supplied by author]

Breast cancer diagnoses and procedure codes

| Description of condition                                                                        | ICD-9 diagnosis or procedure code                                                                              | CPT code         |
|-------------------------------------------------------------------------------------------------|----------------------------------------------------------------------------------------------------------------|------------------|
| Breast cancer (overall)                                                                         | 174.x                                                                                                          | G9131 (Invasive) |
| Breast cancer by stage:                                                                         |                                                                                                                |                  |
| • 0                                                                                             | 233.0                                                                                                          |                  |
| • I                                                                                             | 174.0-174.9                                                                                                    | G9071,G9072      |
| • II                                                                                            | Stages 0 - I AND 196.3                                                                                         | G9071,G9072      |
| • III                                                                                           | Stages 0 - II AND 196.0, 198.2                                                                                 |                  |
| • IV                                                                                            | Stages 0 - III AND 196.1, 196.2, 196.5, 196.6, 196.8, 196.9, 197.0-197.8,198.0,198.1,198.3-198.7,198.81,198.82 |                  |
| Breast cancer by site (location):                                                               |                                                                                                                |                  |
| • Nipple and areola                                                                             | 174.0                                                                                                          |                  |
| • Central portion of female breast                                                              | 174.1                                                                                                          |                  |
| • Upper-inner quadrant of female breast                                                         | 174.2                                                                                                          |                  |
| • Lower-inner quadrant of female breast                                                         | 174.3                                                                                                          |                  |
| • Upper-outer quadrant of female breast                                                         | 174.4                                                                                                          |                  |
| • Lower-outer quadrant of female breast                                                         | 174.5                                                                                                          |                  |
| • Axillary tail of female breast                                                                | 174.6                                                                                                          |                  |
| • Other specified sites of female breast                                                        | 174.8                                                                                                          |                  |
| • Malignant neoplasm of breast (female) unspecified                                             | 174.9                                                                                                          |                  |
| Secondary Sites                                                                                 |                                                                                                                |                  |
| • Secondary and unspecified malignant neoplasm of lymph nodes of head face and neck             | 196.0                                                                                                          |                  |
| • Secondary and unspecified malignant neoplasm of intrathoracic lymph nodes                     | 196.1                                                                                                          |                  |
| • Secondary and unspecified malignant neoplasm of intra-abdominal lymph nodes                   | 196.2                                                                                                          |                  |
| • Secondary and unspecified malignant neoplasm of lymph nodes of inguinal region and lower limb | 196.5                                                                                                          |                  |
| • Secondary and unspecified malignant neoplasm of intrapelvic lymph nodes                       | 196.6                                                                                                          |                  |
| • Secondary and unspecified malignant neoplasm of lymph nodes of multiple sites                 | 196.8                                                                                                          |                  |
| • Secondary and unspecified malignant neoplasm of lymph nodes site unspecified                  | 196.9                                                                                                          |                  |
| • Secondary malignant neoplasm of lung                                                          | 197.0                                                                                                          |                  |
| • Secondary malignant neoplasm of mediastinum                                                   | 197.1                                                                                                          |                  |
| • Secondary malignant neoplasm of pleura                                                        | 197.2                                                                                                          |                  |
| • Secondary malignant neoplasm of other respiratory organs                                      | 197.3                                                                                                          |                  |

| Description of condition                                                                                             | ICD-9 diagnosis or procedure code | CPT code                                                                                             |
|----------------------------------------------------------------------------------------------------------------------|-----------------------------------|------------------------------------------------------------------------------------------------------|
| <ul style="list-style-type: none"> <li>Secondary malignant neoplasm of small intestine including duodenum</li> </ul> | 197.4                             |                                                                                                      |
| <ul style="list-style-type: none"> <li>Secondary malignant neoplasm of large intestine and rectum</li> </ul>         | 197.5                             |                                                                                                      |
| <ul style="list-style-type: none"> <li>Secondary malignant neoplasm of retroperitoneum and peritoneum</li> </ul>     | 197.6                             |                                                                                                      |
| <ul style="list-style-type: none"> <li>Malignant neoplasm of liver secondary</li> </ul>                              | 197.7                             |                                                                                                      |
| <ul style="list-style-type: none"> <li>Secondary malignant neoplasm of other digestive organs and spleen</li> </ul>  | 197.8                             |                                                                                                      |
| <ul style="list-style-type: none"> <li>Secondary malignant neoplasm of kidney</li> </ul>                             | 198.0                             |                                                                                                      |
| <ul style="list-style-type: none"> <li>Secondary malignant neoplasm of other urinary organs</li> </ul>               | 198.1                             |                                                                                                      |
| <ul style="list-style-type: none"> <li>Secondary malignant Neoplasm of Skin</li> </ul>                               | 198.2                             |                                                                                                      |
| <ul style="list-style-type: none"> <li>Secondary malignant neoplasm of brain and spinal cord</li> </ul>              | 198.3                             |                                                                                                      |
| <ul style="list-style-type: none"> <li>Secondary malignant neoplasm of other parts of nervous system</li> </ul>      | 198.4                             |                                                                                                      |
| <ul style="list-style-type: none"> <li>Secondary malignant neoplasm of bone and bone marrow</li> </ul>               | 198.5                             |                                                                                                      |
| <ul style="list-style-type: none"> <li>Secondary malignant neoplasm of ovary</li> </ul>                              | 198.6                             |                                                                                                      |
| <ul style="list-style-type: none"> <li>Secondary malignant neoplasm of adrenal gland</li> </ul>                      | 198.7                             |                                                                                                      |
| <ul style="list-style-type: none"> <li>Secondary malignant neoplasm of breast</li> </ul>                             | 198.81                            |                                                                                                      |
| <ul style="list-style-type: none"> <li>Secondary malignant neoplasm of genital organs</li> </ul>                     | 198.82                            |                                                                                                      |
| Breast cancer treatment                                                                                              |                                   |                                                                                                      |
| <ul style="list-style-type: none"> <li>Surgery</li> </ul>                                                            |                                   | <u>Mastectomy</u><br>New: 19301-19307<br>Old: 19140, 19160, 19162, 19180, 19182, 19200, 19220, 19240 |
| <ul style="list-style-type: none"> <li>Radiation</li> </ul>                                                          |                                   | 77280,77285,77290, 19296-19298                                                                       |
| <ul style="list-style-type: none"> <li>Chemotherapy</li> </ul>                                                       |                                   | 90780-90781,96401,96405,96413, 96420,96449,96445,96450,96542                                         |
| Breast cancer screening and other                                                                                    |                                   |                                                                                                      |
| <ul style="list-style-type: none"> <li>Mammography</li> </ul>                                                        | V76.11, V76.12                    | 77057, G0204, G0202                                                                                  |

**Appendix B: CYP2D6 enzyme inhibitors and inducers**

| <b>Drug class</b>                    | <b>Drug name</b>                                                                                                                                                                                                                     |
|--------------------------------------|--------------------------------------------------------------------------------------------------------------------------------------------------------------------------------------------------------------------------------------|
| Drugs that induce the CYP2D6 enzyme  | <ul style="list-style-type: none"><li>• Dexamethasone</li><li>• Rifampin</li><li>• Amiodarone</li><li>• Bupropion</li><li>• Cimetidine</li><li>• Clozapine</li><li>• Desipramine</li><li>• Duloxetine</li><li>• Fluoxetine</li></ul> |
| Drugs that inhibit the CYP2D6 enzyme | <ul style="list-style-type: none"><li>• Haloperidol</li><li>• Lidocaine</li><li>• Methadone</li><li>• Paroxetine</li><li>• Pimozide</li><li>• Quinidine</li><li>• Ritonavir</li><li>• Sertraline</li><li>• Ticlopidine</li></ul>     |
