# Supplementary material for: Risk of mortality with concomitant use of tamoxifen and selective serotonin reuptake inhibitors: multi-database cohort study
Source: PubMed Central journal article supplement — BMJ. 2016 Sep 30;354:i5014. doi: 10.1136/bmj.i5014 (PMC5044871; doi:10.1136/bmj.i5014), 2016-09-30
Supplement: donm032731.ww2_default.pdf [file donm032731.ww2_default.pdf]

**Appendix 2: Supplementary tables [posted as supplied by author]**

**Table A: Distribution of patient characteristics at baseline pooled across databases**

| Patient characteristics                                        | Cohort 1                          |                       |                                   |                                | Cohort 2                          |                       |                                   |                                      |
|----------------------------------------------------------------|-----------------------------------|-----------------------|-----------------------------------|--------------------------------|-----------------------------------|-----------------------|-----------------------------------|--------------------------------------|
|                                                                | Unmatched                         |                       | Matched (1:10)*                   |                                | Unmatched                         |                       | Matched (1:10)*                   |                                      |
|                                                                | CYP2D6-inhibiting SSRIs<br>n=2268 | Other SSRIs<br>n=3799 | CYP2D6-inhibiting SSRIs<br>n=2026 | SSRIs<br>n=2026 out of<br>3774 | CYP2D6-inhibiting SSRIs<br>n=3531 | Other SSRIs<br>n=4934 | CYP2D6-inhibiting SSRIs<br>n=3025 | Other SSRIs<br>n=3025 out of<br>4768 |
| Database, n (%)                                                |                                   |                       |                                   |                                |                                   |                       |                                   |                                      |
| MAX                                                            | 1080 (47.6)                       | 1253 (33.0)           | 911 (45.0)                        | 911 (45.0)                     | 1804 (51.1)                       | 1825 (37.0)           | 1444 (47.7)                       | 1444 (47.7)                          |
| PAAD                                                           | 117 (5.2)                         | 125 (3.3)             | 79 (3.9)                          | 79 (3.9)                       | 135 (3.8)                         | 136 (2.8)             | 93 (3.1)                          | 93 (3.1)                             |
| PACE                                                           | 267 (11.8)                        | 381 (10.0)            | 249 (12.3)                        | 249 (12.3)                     | 241 (6.8)                         | 238 (4.8)             | 174 (5.8)                         | 174 (5.8)                            |
| Optum                                                          | 745 (32.8)                        | 1899 (50.0)           | 740 (36.5)                        | 740 (36.5)                     | 1224 (34.7)                       | 2529 (51.3)           | 1209 (40.0)                       | 1209 (40.0)                          |
| Caremark                                                       | 59 (2.6)                          | 141 (3.7)             | 47 (2.3)                          | 47 (2.3)                       | 127 (3.6)                         | 206 (4.2)             | 105 (3.5)                         | 105 (3.5)                            |
| <b>Demographics</b>                                            |                                   |                       |                                   |                                |                                   |                       |                                   |                                      |
| Age, mean (±SD)                                                | 57 (±14)                          | 55 (±14)              | 57 (±14)                          | 56 (±14)                       | 55 (±13)                          | 54 (±13)              | 55 (±13)                          | 54 (±13)                             |
| Index year, n (%)                                              |                                   |                       |                                   |                                |                                   |                       |                                   |                                      |
| 1995-1999                                                      | 250 (11.0)                        | 292 (7.7)             | 214 (10.6)                        | 210 (10.4)                     | 207 (5.9)                         | 189 (3.8)             | 148 (4.9)                         | 151 (5.0)                            |
| 2000-2004                                                      | 1402 (61.8)                       | 1717 (45.2)           | 1227 (60.6)                       | 1202 (59.3)                    | 2239 (63.4)                       | 2226 (45.1)           | 1847 (60.6)                       | 1831 (60.0)                          |
| 2005-2009                                                      | 504 (22.2)                        | 1224 (32.2)           | 473 (23.3)                        | 504 (24.9)                     | 857 (24.3)                        | 1713 (34.7)           | 822 (27.0)                        | 820 (26.9)                           |
| 2010-2013                                                      | 112 (4.9)                         | 566 (14.9)            | 112 (5.5)                         | 110 (5.4)                      | 228 (6.5)                         | 806 (16.3)            | 233 (7.6)                         | 248 (8.1)                            |
| <b>Breast cancer characteristics</b>                           |                                   |                       |                                   |                                |                                   |                       |                                   |                                      |
| Breast cancer, n (%)                                           | 1152 (50.8)                       | 2172 (57.2)           | 1034 (51.0)                       | 1027 (50.7)                    | 1783 (50.5)                       | 2727 (55.3)           | 1559 (51.1)                       | 1561 (51.2)                          |
| Breast cancer site, n (%)                                      |                                   |                       |                                   |                                |                                   |                       |                                   |                                      |
| Nipple and areola                                              | 137 (6.0)                         | 229 (6.0)             | 115 (5.7)                         | 123 (6.1)                      | 166 (4.7)                         | 224 (4.5)             | 136 (4.5)                         | 146 (4.8)                            |
| Central                                                        | 249 (11.0)                        | 514 (13.5)            | 225 (11.1)                        | 236 (11.6)                     | 335 (9.5)                         | 535 (10.8)            | 288 (9.4)                         | 287 (9.4)                            |
| Upper-inner                                                    | 173 (7.6)                         | 375 (9.9)             | 153 (7.6)                         | 155 (7.7)                      | 225 (6.4)                         | 439 (8.9)             | 199 (6.5)                         | 208 (6.8)                            |
| Lower-inner                                                    | 116 (5.1)                         | 218 (5.7)             | 100 (4.9)                         | 103 (5.1)                      | 154 (4.4)                         | 252 (5.1)             | 134 (4.4)                         | 131 (4.3)                            |
| Upper-outer                                                    | 701 (30.9)                        | 1344 (35.4)           | 624 (30.8)                        | 624 (30.8)                     | 921 (26.1)                        | 1508 (30.6)           | 802 (26.3)                        | 824 (27.0)                           |
| Lower-outer                                                    | 151 (6.7)                         | 313 (8.2)             | 126 (6.2)                         | 132 (6.5)                      | 204 (5.8)                         | 361 (7.3)             | 181 (5.9)                         | 175 (5.7)                            |
| Auxiliary tail                                                 | 30 (1.3)                          | 70 (1.8)              | 22 (1.1)                          | 24 (1.2)                       | 51 (1.4)                          | 78 (1.6)              | 45 (1.5)                          | 46 (1.5)                             |
| Other/Unspecified                                              | 1786 (78.7)                       | 3155 (83.0)           | 1589 (78.4)                       | 1591 (78.5)                    | 2428 (68.8)                       | 3602 (73.0)           | 2090 (68.5)                       | 2095 (68.7)                          |
| Breast cancer stage any time prior to SSRI, n (%) <sup>†</sup> |                                   |                       |                                   |                                |                                   |                       |                                   |                                      |
| 0                                                              | 632 (27.9)                        | 1370 (36.1)           | 574 (28.3)                        | 605 (29.9)                     | 938 (26.6)                        | 1585 (32.1)           | 826 (27.1)                        | 839 (27.5)                           |
| I                                                              | 614 (27.1)                        | 1335 (35.1)           | 557 (27.5)                        | 589 (29.1)                     | 884 (25.0)                        | 1498 (30.4)           | 783 (25.7)                        | 794 (26.0)                           |
| II                                                             | 122 (5.4)                         | 253 (6.7)             | 105 (5.2)                         | 110 (5.4)                      | 157 (4.4)                         | 320 (6.5)             | 139 (4.6)                         | 146 (4.8)                            |

| Patient characteristics                                    | Cohort 1                          |                       |                                   |                                | Cohort 2                          |                       |                                   |                                      |
|------------------------------------------------------------|-----------------------------------|-----------------------|-----------------------------------|--------------------------------|-----------------------------------|-----------------------|-----------------------------------|--------------------------------------|
|                                                            | Unmatched                         |                       | Matched (1:10)*                   |                                | Unmatched                         |                       | Matched (1:10)*                   |                                      |
|                                                            | CYP2D6-inhibiting SSRIs<br>n=2268 | Other SSRIs<br>n=3799 | CYP2D6-inhibiting SSRIs<br>n=2026 | SSRIs<br>n=2026 out of<br>3774 | CYP2D6-inhibiting SSRIs<br>n=3531 | Other SSRIs<br>n=4934 | CYP2D6-inhibiting SSRIs<br>n=3025 | Other SSRIs<br>n=3025 out of<br>4768 |
| <b><u>Prior breast cancer screening and treatments</u></b> |                                   |                       |                                   |                                |                                   |                       |                                   |                                      |
| Chemotherapy, n (%)                                        | 322 (14.2)                        | 678 (17.8)            | 294 (14.5)                        | 296 (14.6)                     | 522 (14.8)                        | 895 (18.1)            | 455 (14.9)                        | 458 (15.0)                           |
| Mammography, n (%)                                         | 792 (34.9)                        | 1734 (45.6)           | 715 (35.3)                        | 740 (36.5)                     | 1266 (35.9)                       | 2278 (46.2)           | 1129 (37.0)                       | 1114 (36.5)                          |
| Mastectomy, n (%)                                          | 937 (41.3)                        | 1930 (50.8)           | 841 (41.5)                        | 844 (41.7)                     | 1154 (32.7)                       | 1828 (37.0)           | 997 (32.7)                        | 997 (32.7)                           |
| Radiation, n (%)                                           | 666 (29.4)                        | 1268 (33.4)           | 586 (28.9)                        | 601 (29.7)                     | 725 (20.5)                        | 1233 (25.0)           | 641 (21.0)                        | 642 (21.0)                           |
| <b><u>Medication utilization</u></b>                       |                                   |                       |                                   |                                |                                   |                       |                                   |                                      |
| Pre-SSRI tamoxifen total days of supply, mean (±SD)        | 150 (±220)                        | 168 (±245)            | 150 (±217)                        | 152 (±223)                     | -                                 | -                     | -                                 | -                                    |
| Pre-tamoxifen SSRI days of supply, mean (±SD)              |                                   |                       |                                   |                                | 8 (±7)                            | 8 (±6)                | 2 (±2)                            | 2 (±2)                               |
| Number of generics, mean (±SD)                             | 11 (±8)                           | 11 (±8)               | 11 (±8)                           | 11 (±8)                        | 8 (±7)                            | 8 (±6)                | 8 (±7)                            | 8 (±6)                               |
| Vaccine, n (%)                                             | 237 (10.4)                        | 501 (13.2)            | 212 (10.5)                        | 235 (11.6)                     | 211 (6.0)                         | 371 (7.5)             | 196 (6.4)                         | 174 (5.7)                            |
| Anticoagulants, n (%)                                      | 152 (6.7)                         | 286 (7.5)             | 142 (7.0)                         | 127 (6.3)                      | 212 (6.0)                         | 308 (6.2)             | 184 (6.0)                         | 185 (6.1)                            |
| Antiplatelets, n (%)                                       | 43 (1.9)                          | 77 (2.0)              | 40 (2.0)                          | 38 (1.9)                       | 45 (1.3)                          | 70 (1.4)              | 38 (1.2)                          | 34 (1.1)                             |
| Antipsychotics, n (%)                                      | 190 (8.4)                         | 272 (7.2)             | 166 (8.2)                         | 178 (8.8)                      | 364 (10.3)                        | 472 (9.6)             | 316 (10.4)                        | 327 (10.7)                           |
| Angiotensin converting enzyme-inhibitors, n (%)            | 382 (16.8)                        | 544 (14.3)            | 333 (16.4)                        | 344 (17.0)                     | 551 (15.6)                        | 630 (12.8)            | 452 (14.8)                        | 425 (13.9)                           |
| Angiotensin receptor blockers, n (%)                       | 171 (7.5)                         | 326 (8.6)             | 152 (7.5)                         | 161 (7.9)                      | 225 (6.4)                         | 332 (6.7)             | 200 (6.6)                         | 202 (6.6)                            |
| Beta-blockers, n (%)                                       | 419 (18.5)                        | 640 (16.8)            | 368 (18.2)                        | 343 (16.9)                     | 539 (15.3)                        | 710 (14.4)            | 470 (15.4)                        | 450 (14.8)                           |
| Calcium channel blockers, n (%)                            | 357 (15.7)                        | 548 (14.4)            | 310 (15.3)                        | 304 (15.0)                     | 497 (14.1)                        | 520 (10.5)            | 378 (12.4)                        | 371 (12.2)                           |
| Diuretics, n (%)                                           | 404 (17.8)                        | 616 (16.2)            | 339 (16.7)                        | 334 (16.5)                     | 566 (16.0)                        | 665 (13.5)            | 463 (15.2)                        | 447 (14.7)                           |
| Statins, n (%)                                             | 331 (14.6)                        | 587 (15.5)            | 298 (14.7)                        | 290 (14.3)                     | 544 (15.4)                        | 762 (15.4)            | 474 (15.5)                        | 458 (15.0)                           |
| Antidepressants drugs, n (%)                               | 1034 (45.6)                       | 1683 (44.3)           | 895 (44.2)                        | 876 (43.2)                     | 798 (22.6)                        | 1068 (21.6)           | 682 (22.4)                        | 653 (21.4)                           |
| Benzodiazepines, n (%)                                     | 942 (41.5)                        | 1655 (43.6)           | 822 (40.6)                        | 826 (40.8)                     | 1275 (36.1)                       | 1850 (37.5)           | 1073 (35.2)                       | 1080 (35.4)                          |
| Bisphosphonates, n (%)                                     | 130 (5.7)                         | 259 (6.8)             | 110 (5.4)                         | 112 (5.5)                      | 167 (4.7)                         | 200 (4.1)             | 129 (4.2)                         | 130 (4.3)                            |
| CYP2D6 enzyme Inductors, n (%)                             | 265 (11.7)                        | 531 (14.0)            | 245 (12.1)                        | 234 (11.5)                     | 378 (10.7)                        | 690 (14.0)            | 345 (11.3)                        | 351 (11.5)                           |
| CYP2D6 enzyme Inhibitors, n (%)                            | 816 (36.0)                        | 1015 (26.7)           | 676 (33.4)                        | 673 (33.2)                     | 400 (11.3)                        | 674 (13.7)            | 356 (11.7)                        | 341 (11.2)                           |
| Estrogens/hormone therapy, n (%)                           | 261 (11.5)                        | 390 (10.3)            | 215 (10.6)                        | 214 (10.6)                     | 338 (9.6)                         | 460 (9.3)             | 274 (9.0)                         | 271 (8.9)                            |

|                                                   | Cohort 1                          |                       |                                   |                                | Cohort 2                          |                       |                                   |                                      |
|---------------------------------------------------|-----------------------------------|-----------------------|-----------------------------------|--------------------------------|-----------------------------------|-----------------------|-----------------------------------|--------------------------------------|
|                                                   | Unmatched                         |                       | Matched (1:10)*                   |                                | Unmatched                         |                       | Matched (1:10)*                   |                                      |
| <b>Patient characteristics</b>                    | CYP2D6-inhibiting SSRIs<br>n=2268 | Other SSRIs<br>n=3799 | CYP2D6-inhibiting SSRIs<br>n=2026 | SSRIs<br>n=2026 out of<br>3774 | CYP2D6-inhibiting SSRIs<br>n=3531 | Other SSRIs<br>n=4934 | CYP2D6-inhibiting SSRIs<br>n=3025 | Other SSRIs<br>n=3025 out of<br>4768 |
| <b><u>Healthcare utilization</u></b>              |                                   |                       |                                   |                                |                                   |                       |                                   |                                      |
| Hospital admission, n (%)                         | 688 (30.3)                        | 1158 (30.5)           | 605 (29.9)                        | 600 (29.6)                     | 755 (21.4)                        | 1083 (21.9)           | 640 (21.0)                        | 637 (20.9)                           |
| Number of days hospitalized, mean (±SD)           | 2 (±6)                            | 2 (±8)                | 2 (±6)                            | 2 (±7)                         | 2 (±5)                            | 2 (±7)                | 2 (±6)                            | 2 (±6)                               |
| Number of Medical Practitioner visits, mean (±SD) | 11 (±12)                          | 13 (±13)              | 11 (±12)                          | 11 (±12)                       | 6 (±6)                            | 7 (±7)                | 6 (±6)                            | 6 (±6)                               |
| Combined comorbidity score, mean (±SD)            | 2 (±3)                            | 2 (±3)                | 2 (±3)                            | 2 (±3)                         | 2 (±2)                            | 2 (±2)                | 2 (±2)                            | 2 (±2)                               |

\* Patients with a CYP2D6-inhibiting SSRI were matched on the propensity score to at least 1 and at most 10 patients with another SSRI. A random patient in the other SSRI group was drawn from each matched set to show covariate balance resulting from the matching process.

Cohort 1: Patients were exposed to tamoxifen prior to initiating an SSRI.

Cohort 2: Patients were exposed to an SSRI prior to initiating tamoxifen.

† Data for stages III and IV breast cancer are suppressed in accordance with CMS's current cell size suppression policy, which stipulates that no cell (e.g. admissions, discharges, patients, services) 10 or less may be displayed.

**Caremark**, Medicare data linked to pharmacy claims data from CVS Caremark (2005-2008); **MAX**, Medicaid Analytic Extract (2001-2006); **PAAD**, and the New Jersey Pharmaceutical Assistance to the Aged and Disabled (1995-2005); **PACE**, the Pennsylvania Pharmaceutical Assistance Contract for the Elderly (1995-2005); **Optum Research Database** (2004-2013), comprises data on approximately 40 million UnitedHealth enrollees.

**Table B:** Effects estimate among patient population prior to propensity score matching

| Study design                                                                 | Deaths/Total | HR   | 95%  | 95%  | P    |
|------------------------------------------------------------------------------|--------------|------|------|------|------|
|                                                                              |              |      | LCL  | UCL  |      |
| <b>Primary analysis</b>                                                      |              |      |      |      |      |
| Pooled databases (Cohort 1)                                                  | 1054/ 6183   | 0.98 | 0.87 | 1.11 | 0.79 |
| Pooled databases (Cohort 2)                                                  | 1146/ 8798   | 1.08 | 0.96 | 1.22 | 0.19 |
| Overall population (Cohorts 1 and 2)                                         | 2200/ 14981  | 0.96 | 0.86 | 1.07 | 0.43 |
| <b>Sensitivity analyses:<sup>a</sup></b>                                     |              |      |      |      |      |
| <b>As-treated analysis*</b>                                                  |              |      |      |      |      |
| Pooled databases (Cohort 1)                                                  | 41/ 6183     | 0.85 | 0.45 | 1.62 | 0.63 |
| Pooled databases (Cohort 2)                                                  | 84/ 8798     | 1.24 | 0.81 | 1.91 | 0.32 |
| Overall population (Cohorts 1 and 2)                                         | 125/ 14981   | 0.92 | 0.64 | 1.32 | 0.65 |
| <b>Patients with pre-existing breast cancer diagnosis (stages I-IV only)</b> |              |      |      |      |      |
| Pooled databases (Cohort 1)                                                  | 379/ 1915    | 1.07 | 0.87 | 1.31 | 0.53 |
| Pooled databases (Cohort 2)                                                  | 402/ 2732    | 1.16 | 0.95 | 1.41 | 0.14 |
| Overall population (Cohorts 1 and 2)                                         | 781/ 4647    | 0.97 | 0.79 | 1.20 | 0.81 |

**Table C:** All-cause mortality associated with concomitant use of tamoxifen and CYP2D6-inhibiting selective serotonin reuptake inhibitors (SSRIs) vs. tamoxifen and other SSRIs in as-treated analyses.

| Database                                           | Deaths/Total       | Hazard ratio | 95% confidence interval |             |
|----------------------------------------------------|--------------------|--------------|-------------------------|-------------|
|                                                    |                    |              | Lower                   | Upper       |
| <b>Cohort 1</b>                                    |                    |              |                         |             |
| Caremark                                           | * / 174            | 0.00         | 0.00                    | 0.00        |
| MAX                                                | 13 / 2112          | 0.43         | 0.12                    | 1.62        |
| PACE                                               | 18 / 624           | 0.79         | 0.30                    | 2.06        |
| PAAD                                               | */ 201             | 0.50         | 0.04                    | 5.69        |
| Optum                                              | * / 2638           | 0.54         | 0.05                    | 6.19        |
| <b>Pooled databases (Cohort 1)</b>                 | <b>39 / 5749</b>   | <b>0.63</b>  | <b>0.31</b>             | <b>1.28</b> |
| <b>Cohort 2</b>                                    |                    |              |                         |             |
| Caremark                                           | 11 / 307           | 1.51         | 0.43                    | 5.32        |
| MAX                                                | 31 / 3113          | 0.96         | 0.47                    | 1.96        |
| PACE                                               | 19 / 410           | 1.19         | 0.47                    | 3.01        |
| PAAD                                               | 8 / 226            | 1.81         | 0.40                    | 8.10        |
| Optum                                              | 10 / 3737          | 0.91         | 0.22                    | 3.7         |
| <b>Pooled databases (Cohort 2)</b>                 | <b>79 / 7793</b>   | <b>1.12</b>  | <b>0.71</b>             | <b>1.78</b> |
| <b>Pooled databases (Cohorts 1 and 2 combined)</b> | <b>118 / 13628</b> | <b>0.99</b>  | <b>0.67</b>             | <b>1.46</b> |

\*Data suppressed according to CMS's current cell size suppression policy, which stipulates that no cell (e.g. admissions, discharges, patients, services) 10 or less may be displayed.

**Caremark**, Medicare data linked to pharmacy claims data from CVS Caremark (2005-2008); **MAX**, Medicaid Analytic eXtract (2001-2006); **PAAD**, and the New Jersey Pharmaceutical Assistance to the Aged and Disabled (1995-2005); **PACE**, the Pennsylvania Pharmaceutical Assistance Contract for the Elderly (1995-2005); **Optum Research Database** (2004-2013), comprises data on approximately 40 million UnitedHealth enrollees.

**Table D:** All-cause mortality associated with concomitant use of tamoxifen and CYP2D6-inhibiting selective serotonin reuptake inhibitors (SSRIs) vs. tamoxifen and other SSRIs among only patients with a breast cancer diagnosis in the baseline period.

| Database                                                       | Deaths/Total      | Hazard ratio | 95% confidence interval |             |
|----------------------------------------------------------------|-------------------|--------------|-------------------------|-------------|
|                                                                |                   |              | Lower                   | Upper       |
| <b>Main analysis</b>                                           |                   |              |                         |             |
| Pooled databases (Cohort 1)                                    | 429 / 3071        | 0.99         | 0.81                    | 1.21        |
| Pooled databases (Cohort 2)                                    | 460 / 4199        | 1.07         | 0.88                    | 1.31        |
| <b>All tamoxifen users (Cohorts 1 and 2)</b>                   | <b>889 / 7270</b> | <b>1.03</b>  | <b>0.89</b>             | <b>1.18</b> |
| <b>As-treated analysis</b>                                     |                   |              |                         |             |
| Pooled databases (Cohort 1)                                    | 20 / 3071         | 0.68         | 0.26                    | 1.82        |
| Pooled databases (Cohort 2)                                    | 37 / 4199         | 0.95         | 0.47                    | 1.89        |
| <b>All tamoxifen users (Cohorts 1 and 2)</b>                   | <b>57 / 7270</b>  | <b>0.77</b>  | <b>0.44</b>             | <b>1.38</b> |
| <b>Duration of concomitant exposure to tamoxifen and SSRIs</b> |                   |              |                         |             |
| 30 days                                                        | 704/ 5922         | 1.08         | 0.92                    | 1.27        |
| 60 days                                                        | 415/ 3719         | 0.97         | 0.78                    | 1.20        |
| 90 days                                                        | 305/ 2816         | 0.93         | 0.73                    | 1.19        |
| 120 days                                                       | 264/ 2100         | 1.07         | 0.81                    | 1.42        |
| 180 days                                                       | 177/ 1428         | 1.30         | 0.93                    | 1.83        |
| 240 days                                                       | 128/ 987          | 1.36         | 0.90                    | 2.06        |

**Table E:** Risk of all-cause mortality associated with concomitant use of tamoxifen and CYP2D6-inhibiting selective serotonin reuptake inhibitors (SSRIs) vs. tamoxifen and other SSRIs in sensitivity analyses.

| Study design                                                                 | Deaths                                        | Person-years | Rate** | Deaths                     | Person-years | Rate** | HR (95% CI)         |
|------------------------------------------------------------------------------|-----------------------------------------------|--------------|--------|----------------------------|--------------|--------|---------------------|
|                                                                              | Tamoxifen plus potent CYP2D6-inhibiting SSRIs |              |        | Tamoxifen plus other SSRIs |              |        |                     |
| <b>Primary analysis</b>                                                      |                                               |              |        |                            |              |        |                     |
| Pooled databases (Cohort 1)                                                  | 610                                           | 9524         | 64.1   | 381                        | 5895         | 64.6   | 0.91 (0.80 to 1.04) |
| Pooled databases (Cohort 2)                                                  | 407                                           | 7541         | 54.0   | 607                        | 11488        | 52.8   | 1.02 (0.89 to 1.16) |
| Overall population (Cohorts 1 and 2)                                         | 788                                           | 13436        | 58.7   | 1217                       | 21013        | 57.9   | 0.96 (0.88 to 1.06) |
| <b>Sensitivity analyses:<sup>a</sup></b>                                     |                                               |              |        |                            |              |        |                     |
| <b>As-treated analysis*</b>                                                  |                                               |              |        |                            |              |        |                     |
| Pooled databases (Cohort 1)                                                  | 26                                            | 1127         | 19.2   | 12                         | 624          | 23.1   | 0.68 (0.34 to 1.38) |
| Pooled databases (Cohort 2)                                                  | 35                                            | 1179         | 29.7   | 44                         | 1775         | 24.8   | 1.19 (0.75 to 1.89) |
| Overall population (Cohorts 1 and 2)                                         | 62                                            | 3022         | 20.5   | 94                         | 4709         | 20.0   | 0.99 (0.67 to 1.46) |
| <b>Patients with pre-existing breast cancer diagnosis (stages 0-IV)</b>      |                                               |              |        |                            |              |        |                     |
| Pooled databases (Cohort 1)                                                  | 161                                           | 2587         | 62.2   | 268                        | 4984         | 53.8   | 0.99 (0.81 to 1.21) |
| Pooled databases (Cohort 2)                                                  | 182                                           | 3630         | 50.1   | 278                        | 6150         | 45.2   | 1.07 (0.88 to 1.31) |
| Overall population (Cohorts 1 and 2)                                         | 343                                           | 6217         | 55.2   | 546                        | 11133        | 49.0   | 1.03 (0.89 to 1.18) |
| <b>Patients with pre-existing breast cancer diagnosis (stages I-IV only)</b> |                                               |              |        |                            |              |        |                     |
| Pooled databases (Cohort 1)                                                  | 268                                           | 4984         | 53.8   | 192                        | 2778         | 69.1   | 0.95 (0.75 to 1.21) |
| Pooled databases (Cohort 2)                                                  | 141                                           | 2339         | 60.3   | 205                        | 3720         | 55.1   | 1.07 (0.85 to 1.33) |
| Overall population (Cohorts 1 and 2)                                         | 546                                           | 11133        | 49.0   | 397                        | 6498         | 61.1   | 1.04 (0.86 to 1.26) |
| <b>Paroxetine use versus other SSRIs<sup>†</sup></b>                         |                                               |              |        |                            |              |        |                     |
| Pooled databases (Cohort 1)                                                  | 92                                            | 2574         | 35.8   | 220                        | 6753         | 32.6   | 1.03 (0.80 to 1.33) |
| Pooled databases (Cohort 2)                                                  | 124                                           | 3931         | 31.6   | 342                        | 9741         | 35.1   | 0.89 (0.72 to 1.11) |
| Overall population (Cohorts 1 and 2)                                         | 92                                            | 2574         | 35.8   | 220                        | 6753         | 32.6   | 0.95 (0.81 to 1.12) |
| <b>Fluoxetine use versus other SSRIs<sup>††</sup></b>                        |                                               |              |        |                            |              |        |                     |
| Pooled databases (Cohort 1)                                                  | 53                                            | 1882         | 28.2   | 231                        | 7298         | 31.7   | 0.99 (0.73 to 1.34) |
| Pooled databases (Cohort 2)                                                  | 109                                           | 3156         | 34.5   | 349                        | 10022        | 34.8   | 1.05 (0.85 to 1.31) |
| Overall population (Cohorts 1 and 2)                                         | 162                                           | 5038         | 32.2   | 580                        | 17320        | 33.5   | 1.04 (0.87 to 1.25) |

**Table F: Distribution of patient characteristics at baseline from Caremark database**

|                                                     | Cohort 1                     |                   |                              |                                 | Cohort 2                      |                   |                               |                                  |
|-----------------------------------------------------|------------------------------|-------------------|------------------------------|---------------------------------|-------------------------------|-------------------|-------------------------------|----------------------------------|
|                                                     | Unmatched                    |                   | Matched (1:10) <sup>†</sup>  |                                 | Unmatched                     |                   | Matched (1:10) <sup>†</sup>   |                                  |
|                                                     | CYP2D6-inhibiting SSRIs n=59 | Other SSRIs n=141 | CYP2D6-inhibiting SSRIs n=47 | Other SSRIs n=47 of 127 matched | CYP2D6-inhibiting SSRIs n=127 | Other SSRIs n=206 | CYP2D6-inhibiting SSRIs n=105 | Other SSRIs n=105 of 202 matched |
| <b>Demographics</b>                                 |                              |                   |                              |                                 |                               |                   |                               |                                  |
| Age, mean (±SD)                                     | 75 (±8)                      | 77 (±8)           | 76 (±7)                      | 77 (±7)                         | 75 (±7)                       | 76 (±8)           | 76 (±7)                       | 75 (±8)                          |
| Index year, n (%)                                   |                              |                   |                              |                                 |                               |                   |                               |                                  |
| 2005                                                | 20 (33.9)                    | 53 (37.6)         | 18 (38.3)                    | 18 (38.3)                       | 61 (48.0)                     | 80 (38.8)         | 48 (45.7)                     | 51 (48.6)                        |
| 2006                                                | 12 (20.3)                    | 33 (23.4)         | *                            | 11 (23.4)                       | 21 (16.5)                     | 25 (12.1)         | 17 (16.2)                     | 14 (13.3)                        |
| 2007                                                | *                            | 20 (14.2)         | *                            | *                               | 16 (12.6)                     | 32 (15.5)         | 15 (14.3)                     | 13 (12.4)                        |
| 2008                                                | 20 (33.9)                    | 35 (24.8)         | 14 (29.8)                    | 14 (29.8)                       | 29 (22.8)                     | 69 (33.5)         | 25 (23.8)                     | 27 (25.7)                        |
| <b>Comorbidities</b>                                |                              |                   |                              |                                 |                               |                   |                               |                                  |
| Breast cancer, n (%)                                | 17 (28.8)                    | 40 (28.4)         | 11 (23.4)                    | *                               | 38 (29.9)                     | 70 (34.0)         | 33 (31.4)                     | 35 (33.3)                        |
| Breast cancer site, n (%)                           |                              |                   |                              |                                 |                               |                   |                               |                                  |
| Nipple and areola                                   | *                            | *                 | *                            | *                               | *                             | *                 | *                             | *                                |
| Central                                             | *                            | 13 (9.2)          | *                            | *                               | 14 (11.0)                     | *                 | *                             | *                                |
| Upper-inner                                         | *                            | *                 | *                            | *                               | *                             | *                 | *                             | *                                |
| Lower-inner                                         | *                            | *                 | *                            | 47 (100.0)                      | *                             | *                 | *                             | *                                |
| Upper-outer                                         | 15 (25.4)                    | 41 (29.1)         | 11 (23.4)                    | *                               | 21 (16.5)                     | 39 (18.9)         | 19 (18.1)                     | 18 (17.1)                        |
| Lower-outer                                         | *                            | *                 | *                            | *                               | *                             | *                 | *                             | *                                |
| Auxiliary tail                                      | *                            | *                 | *                            | *                               | *                             | *                 | *                             | *                                |
| Other/Unspecified                                   | 44 (74.6)                    | 118 (83.7)        | 34 (72.3)                    | 37 (78.7)                       | 85 (66.9)                     | 132 (64.1)        | 66 (62.9)                     | 65 (61.9)                        |
| Breast cancer stage any time prior to SSRI, n (%)   |                              |                   |                              |                                 |                               |                   |                               |                                  |
| 0                                                   | *                            | 30 (21.3)         | *                            | *                               | 24 (18.9)                     | 47 (22.8)         | 19 (18.1)                     | 22 (21.0)                        |
| I                                                   | *                            | 30 (21.3)         | *                            | *                               | 23 (18.1)                     | 40 (19.4)         | 18 (17.1)                     | 18 (17.1)                        |
| II                                                  | *                            | *                 | *                            | 47 (100.0)                      | *                             | *                 | *                             | *                                |
| III                                                 | *                            | 141 (100.0)       | *                            | 47 (100.0)                      | *                             | *                 | *                             | *                                |
| IV                                                  | *                            | 141 (100.0)       | *                            | 47 (100.0)                      | *                             | *                 | *                             | *                                |
| <b>Procedures</b>                                   |                              |                   |                              |                                 |                               |                   |                               |                                  |
| Chemotherapy, n (%)                                 | *                            | *                 | *                            | *                               | *                             | *                 | *                             | *                                |
| Mammography, n (%)                                  | 29 (49.2)                    | 79 (56.0)         | 20 (42.6)                    | 22 (46.8)                       | 59 (46.5)                     | 98 (47.6)         | 49 (46.7)                     | 48 (45.7)                        |
| Mastectomy, n (%)                                   | 16 (27.1)                    | 33 (23.4)         | *                            | *                               | 30 (23.6)                     | 37 (18.0)         | 20 (19.0)                     | 23 (21.9)                        |
| Radiation, n (%)                                    | 16 (27.1)                    | 21 (14.9)         | *                            | 11 (23.4)                       | 17 (13.4)                     | 27 (13.1)         | 13 (12.4)                     | 11 (10.5)                        |
| <b>Medication utilization</b>                       |                              |                   |                              |                                 |                               |                   |                               |                                  |
| Pre-SSRI tamoxifen total days of supply, mean (±SD) | 95 (±95)                     | 118 (±130)        | 100 (±101)                   | 109 (±107)                      | -                             | -                 | -                             | -                                |
| Pre-tamoxifen SSRI days of supply, mean (±SD)       | -                            | -                 | -                            | -                               | 17 (±23)                      | 15 (±19)          | 19 (±24)                      | 17 (±21)                         |

|                                                   | Cohort 1                    |                  |                             |                                | Cohort 2                     |                  |                              |                                 |
|---------------------------------------------------|-----------------------------|------------------|-----------------------------|--------------------------------|------------------------------|------------------|------------------------------|---------------------------------|
|                                                   | Unmatched                   |                  | Matched (1:10) <sup>†</sup> |                                | Unmatched                    |                  | Matched (1:10) <sup>†</sup>  |                                 |
|                                                   | CYP2D6-inhibiting SSRI n=59 | Other SSRI n=141 | CYP2D6-inhibiting SSRI n=47 | Other SSRI n=47 of 127 matched | CYP2D6-inhibiting SSRI n=127 | Other SSRI n=206 | CYP2D6-inhibiting SSRI n=105 | Other SSRI n=105 of 202 matched |
| Number of generics, mean (±SD)                    | *                           | *                | *                           | *                              | *                            | *                | *                            | *                               |
| Vaccine, n (%)                                    | 13 (22.0)                   | 36 (25.5)        | *                           | 12 (25.5)                      | 15 (11.8)                    | 20 (9.7)         | *                            | *                               |
| Anticoagulants, n (%)                             | *                           | 14 (9.9)         | *                           | *                              | 11 (8.7)                     | 17 (8.3)         | *                            | *                               |
| Antiplatelets, n (%)                              | *                           | 13 (9.2)         | *                           | *                              | *                            | 17 (8.3)         | *                            | *                               |
| Antipsychotics, n (%)                             | *                           | *                | *                           | *                              | 11 (8.7)                     | 14 (6.8)         | *                            | *                               |
| Angiotensin converting enzyme-inhibitors, n (%)   | 11 (18.6)                   | 30 (21.3)        | *                           | *                              | 22 (17.3)                    | 53 (25.7)        | 19 (18.1)                    | 19 (18.1)                       |
| Angiotensin receptor blockers, n (%)              | 12 (20.3)                   | 25 (17.7)        | *                           | *                              | 12 (9.4)                     | 29 (14.1)        | 11 (10.5)                    | *                               |
| Beta-blockers, n (%)                              | 19 (32.2)                   | 55 (39.0)        | 16 (34.0)                   | 13 (27.7)                      | 28 (22.0)                    | 68 (33.0)        | 26 (24.8)                    | 27 (25.7)                       |
| Calcium channel blockers, n (%)                   | 13 (22.0)                   | 31 (22.0)        | *                           | 11 (23.4)                      | 27 (21.3)                    | 36 (17.5)        | 19 (18.1)                    | 16 (15.2)                       |
| Diuretics, n (%)                                  | 18 (30.5)                   | 46 (32.6)        | 15 (31.9)                   | 11 (23.4)                      | 29 (22.8)                    | 50 (24.3)        | 22 (21.0)                    | 16 (15.2)                       |
| Satins, n (%)                                     | 19 (32.2)                   | 43 (30.5)        | 15 (31.9)                   | 15 (31.9)                      | 38 (29.9)                    | 62 (30.1)        | 30 (28.6)                    | 30 (28.6)                       |
| Antidepressants drugs, n (%)                      | 17 (28.8)                   | 41 (29.1)        | 12 (25.5)                   | 12 (25.5)                      | 57 (44.9)                    | 100 (48.5)       | 46 (43.8)                    | 44 (41.9)                       |
| Benzodiazepines, n (%)                            | 12 (20.3)                   | 42 (29.8)        | 11 (23.4)                   | 11 (23.4)                      | 15 (11.8)                    | 28 (13.6)        | 13 (12.4)                    | 12 (11.4)                       |
| Bisphosphonates, n (%)                            | *                           | 29 (20.6)        | *                           | *                              | 26 (20.5)                    | 22 (10.7)        | 15 (14.3)                    | 15 (14.3)                       |
| CYP2D6 enzyme Inductors, n (%)                    | *                           | *                | *                           | *                              | *                            | *                | *                            | *                               |
| CYP2D6 enzyme Inhibitors, n (%)                   | *                           | 12 (8.5)         | *                           | *                              | *                            | 11 (5.3)         | *                            | *                               |
| Estrogens/hormone therapy, n (%)                  | *                           | 12 (8.5)         | *                           | *                              | *                            | 12 (5.8)         | *                            | *                               |
| <b>Healthcare utilization</b>                     |                             |                  |                             |                                |                              |                  |                              |                                 |
| Hospital admission, n (%)                         | 11 (18.6)                   | 40 (28.4)        | *                           | *                              | 22 (17.3)                    | 50 (24.3)        | 17 (16.2)                    | 13 (12.4)                       |
| Number of days hospitalized, mean (±SD)           | *                           | *                | *                           | *                              | *                            | *                | *                            | *                               |
| Number of Medical Practitioner visits, mean (±SD) | *                           | *                | *                           | *                              | *                            | *                | *                            | *                               |
| Combined comorbidity score, mean (±SD)            | *                           | *                | *                           | *                              | *                            | *                | *                            | *                               |

<sup>†</sup> Patients with a CYP2D6-inhibiting SSRI were matched on the propensity score to at least 1 and at most 10 patients with another SSRI. A random patient in the other SSRI group was drawn from each matched set to show covariate balance resulting from the matching process.

\* Data suppressed according to CMS' current cell size suppression policy, which stipulates that no cell (e.g. admissions, discharges, patients, services) 10 or less may be displayed.

Cohort 1: Patients were exposed to tamoxifen prior to initiating an SSRI.

Cohort 2: Patients were exposed to an SSRI prior to initiating tamoxifen.



**Table G: Distribution of patient characteristics at baseline from MAX database**

|                                                     | Cohort 1                          |                       |                                  |                                         | Cohort 2                          |                       |                                   |                                          |
|-----------------------------------------------------|-----------------------------------|-----------------------|----------------------------------|-----------------------------------------|-----------------------------------|-----------------------|-----------------------------------|------------------------------------------|
|                                                     | Unmatched                         |                       | Matched (1:10) <sup>†</sup>      |                                         | Unmatched                         |                       | Matched (1:10) <sup>†</sup>       |                                          |
|                                                     | CYP2D6-inhibiting SSRIs<br>n=1080 | Other SSRIs<br>n=1253 | CYP2D6-inhibiting SSRIs<br>n=911 | Other SSRIs<br>n=911 of 1225<br>matched | CYP2D6-inhibiting SSRIs<br>n=1804 | Other SSRIs<br>n=1825 | CYP2D6-inhibiting SSRIs<br>n=1444 | Other SSRIs<br>n=1444 of 1669<br>matched |
| <b>Demographics</b>                                 |                                   |                       |                                  |                                         |                                   |                       |                                   |                                          |
| Age, mean (±SD)                                     | 50 (±9)                           | 50 (±9)               | 50 (±9)                          | 50 (±9)                                 | 50 (±9)                           | 50 (±9)               | 50 (±9)                           | 50 (±9)                                  |
| Index year, n (%)                                   |                                   |                       |                                  |                                         |                                   |                       |                                   |                                          |
| 2000                                                | 71 (6.6)                          | 51 (4.1)              | 51 (5.6)                         | 47 (5.2)                                | 201 (11.1)                        | 143 (7.8)             | 127 (8.8)                         | 120 (8.3)                                |
| 2001                                                | 229 (21.2)                        | 183 (14.6)            | 171 (18.8)                       | 157 (17.2)                              | 334 (18.5)                        | 273 (15.0)            | 242 (16.8)                        | 240 (16.6)                               |
| 2002                                                | 165 (15.3)                        | 183 (14.6)            | 134 (14.7)                       | 136 (14.9)                              | 292 (16.2)                        | 246 (13.5)            | 211 (14.6)                        | 205 (14.2)                               |
| 2003                                                | 214 (19.8)                        | 250 (20.0)            | 190 (20.9)                       | 188 (20.6)                              | 393 (21.8)                        | 371 (20.3)            | 305 (21.1)                        | 316 (21.9)                               |
| 2004                                                | 207 (19.2)                        | 281 (22.4)            | 186 (20.4)                       | 185 (20.3)                              | 283 (15.7)                        | 363 (19.9)            | 272 (18.8)                        | 278 (19.3)                               |
| 2005                                                | 102 (9.4)                         | 138 (11.0)            | 89 (9.8)                         | 94 (10.3)                               | 148 (8.2)                         | 210 (11.5)            | 138 (9.6)                         | 144 (10.0)                               |
| 2006                                                | 92 (8.5)                          | 167 (13.3)            | 90 (9.9)                         | 104 (11.4)                              | 153 (8.5)                         | 219 (12.0)            | 149 (10.3)                        | 141 (9.8)                                |
| <b>Comorbidities</b>                                |                                   |                       |                                  |                                         |                                   |                       |                                   |                                          |
| Breast cancer, n (%)                                | 624 (57.8)                        | 830 (66.2)            | 557 (61.1)                       | 543 (59.6)                              | 1001 (55.5)                       | 1085 (59.5)           | 844 (58.4)                        | 846 (58.6)                               |
| Breast cancer site, n (%)                           |                                   |                       |                                  |                                         |                                   |                       |                                   |                                          |
| Nipple and areola                                   | 68 (6.3)                          | 86 (6.9)              | 58 (6.4)                         | 63 (6.9)                                | 94 (5.2)                          | 109 (6.0)             | 79 (5.5)                          | 81 (5.6)                                 |
| Central                                             | 141 (13.1)                        | 186 (14.8)            | 121 (13.3)                       | 125 (13.7)                              | 188 (10.4)                        | 218 (11.9)            | 166 (11.5)                        | 155 (10.7)                               |
| Upper-inner                                         | 95 (8.8)                          | 111 (8.9)             | 80 (8.8)                         | 82 (9.0)                                | 128 (7.1)                         | 150 (8.2)             | 110 (7.6)                         | 110 (7.6)                                |
| Lower-inner                                         | 51 (4.7)                          | 76 (6.1)              | 46 (5.0)                         | 47 (5.2)                                | 83 (4.6)                          | 92 (5.0)              | 66 (4.6)                          | 72 (5.0)                                 |
| Upper-outer                                         | 362 (33.5)                        | 442 (35.3)            | 314 (34.5)                       | 308 (33.8)                              | 523 (29.0)                        | 545 (29.9)            | 432 (29.9)                        | 428 (29.6)                               |
| Lower-outer                                         | 78 (7.2)                          | 88 (7.0)              | 58 (6.4)                         | 66 (7.2)                                | 115 (6.4)                         | 125 (6.8)             | 98 (6.8)                          | 89 (6.2)                                 |
| Auxiliary tail                                      | 14 (1.3)                          | 35 (2.8)              | 13 (1.4)                         | 12 (1.3)                                | 25 (1.4)                          | 35 (1.9)              | 24 (1.7)                          | 24 (1.7)                                 |
| Other/Unspecified                                   | 916 (84.8)                        | 1097 (87.5)           | 784 (86.1)                       | 783 (85.9)                              | 1386 (76.8)                       | 1453 (79.6)           | 1135 (78.6)                       | 1146 (79.4)                              |
| Breast cancer stage any time prior to SSRI, n (%)   |                                   |                       |                                  |                                         |                                   |                       |                                   |                                          |
| 0                                                   | 328 (30.4)                        | 412 (32.9)            | 287 (31.5)                       | 290 (31.8)                              | 497 (27.5)                        | 545 (29.9)            | 417 (28.9)                        | 423 (29.3)                               |
| I                                                   | 322 (29.8)                        | 405 (32.3)            | 282 (31.0)                       | 284 (31.2)                              | 466 (25.8)                        | 520 (28.5)            | 398 (27.6)                        | 400 (27.7)                               |
| II                                                  | 73 (6.8)                          | 75 (6.0)              | 60 (6.6)                         | 60 (6.6)                                | 82 (4.5)                          | 114 (6.2)             | 69 (4.8)                          | 70 (4.8)                                 |
| III                                                 | *                                 | *                     | *                                | 911 (100.0)                             | *                                 | *                     | *                                 | *                                        |
| IV                                                  | *                                 | *                     | *                                | 911 (100.0)                             | *                                 | *                     | *                                 | *                                        |
| <b>Procedures</b>                                   |                                   |                       |                                  |                                         |                                   |                       |                                   |                                          |
| Chemotherapy, n (%)                                 | 199 (18.4)                        | 260 (20.8)            | 175 (19.2)                       | 171 (18.8)                              | 294 (16.3)                        | 358 (19.6)            | 256 (17.7)                        | 258 (17.9)                               |
| Mammography, n (%)                                  | 340 (31.5)                        | 419 (33.4)            | 297 (32.6)                       | 299 (32.8)                              | 558 (30.9)                        | 591 (32.4)            | 458 (31.7)                        | 444 (30.7)                               |
| Mastectomy, n (%)                                   | 494 (45.7)                        | 675 (53.9)            | 443 (48.6)                       | 438 (48.1)                              | 743 (41.2%)                       | 829 (45.4%)           | 624 (43.2)                        | 632 (43.8)                               |
| Radiation, n (%)                                    | 366 (33.9)                        | 448 (35.8)            | 312 (34.2)                       | 319 (35.0)                              | 420 (23.3)                        | 473 (25.9)            | 352 (24.4)                        | 352 (24.4)                               |
| <b>Medication utilization</b>                       |                                   |                       |                                  |                                         |                                   |                       |                                   |                                          |
| Pre-SSRI tamoxifen total days of supply, mean (±SD) | 128 (±180)                        | 133 (±176)            | 129 (±178)                       | 133 (±181)                              | -                                 | -                     | -                                 | -                                        |

|                                                   | Cohort 1                          |                       |                                  |                                         | Cohort 2                          |                       |                                   |                                          |
|---------------------------------------------------|-----------------------------------|-----------------------|----------------------------------|-----------------------------------------|-----------------------------------|-----------------------|-----------------------------------|------------------------------------------|
|                                                   | Unmatched                         |                       | Matched (1:10) <sup>†</sup>      |                                         | Unmatched                         |                       | Matched (1:10) <sup>†</sup>       |                                          |
|                                                   | CYP2D6-inhibiting SSRIs<br>n=1080 | Other SSRIs<br>n=1253 | CYP2D6-inhibiting SSRIs<br>n=911 | Other SSRIs<br>n=911 of 1225<br>matched | CYP2D6-inhibiting SSRIs<br>n=1804 | Other SSRIs<br>n=1825 | CYP2D6-inhibiting SSRIs<br>n=1444 | Other SSRIs<br>n=1444 of 1669<br>matched |
| Pre-tamoxifen SSRI days of supply, mean (±SD)     | -                                 | -                     | -                                | -                                       | 16 (±14)                          | 15 (±13)              | 15 (±14)                          | 16 (±13)                                 |
| Number of generics, mean (±SD)                    | 13 (±8)                           | 14 (±9)               | 13 (±8)                          | 13 (±9)                                 | *                                 | 11 (±7)               | *                                 | *                                        |
| Vaccine, n (%)                                    | 71 (6.6)                          | 113 (9.0)             | 65 (7.1)                         | 76 (8.3)                                | 81 (4.5)                          | 102 (5.6)             | 75 (5.2)                          | 57 (3.9)                                 |
| Anticoagulants, n (%)                             | 73 (6.8)                          | 109 (8.7)             | 70 (7.7)                         | 60 (6.6)                                | 127 (7.0)                         | 147 (8.1)             | 110 (7.6)                         | 101 (7.0)                                |
| Antiplatelets, n (%)                              | 15 (1.4)                          | 19 (1.5)              | 14 (1.5)                         | 14 (1.5)                                | 21 (1.2)                          | 26 (1.4)              | 20 (1.4)                          | 21 (1.5)                                 |
| Antipsychotics, n (%)                             | 137 (12.7)                        | 178 (14.2)            | 125 (13.7)                       | 130 (14.3)                              | 305 (16.9)                        | 362 (19.8)            | 264 (18.3)                        | 267 (18.5)                               |
| Angiotensin converting enzyme-inhibitors, n (%)   | 178 (16.5)                        | 203 (16.2)            | 144 (15.8)                       | 157 (17.2)                              | 308 (17.1)                        | 272 (14.9)            | 233 (16.1)                        | 221 (15.3)                               |
| Angiotensin receptor blockers, n (%)              | 65 (6.0)                          | 106 (8.5)             | 59 (6.5)                         | 60 (6.6)                                | 110 (6.1)                         | 112 (6.1)             | 85 (5.9)                          | 90 (6.2)                                 |
| Beta-blockers, n (%)                              | 171 (15.8)                        | 218 (17.4)            | 145 (15.9)                       | 151 (16.6)                              | 262 (14.5)                        | 276 (15.1)            | 211 (14.6)                        | 212 (14.7)                               |
| Calcium channel blockers, n (%)                   | 145 (13.4)                        | 175 (14.0)            | 117 (12.8)                       | 118 (13.0)                              | 271 (15.0)                        | 220 (12.1)            | 190 (13.2)                        | 188 (13.0)                               |
| Diuretics, n (%)                                  | 205 (19.0)                        | 226 (18.0)            | 161 (17.7)                       | 172 (18.9)                              | 341 (18.9)                        | 328 (18.0)            | 264 (18.3)                        | 262 (18.1)                               |
| Satins, n (%)                                     | 149 (13.8)                        | 209 (16.7)            | 131 (14.4)                       | 135 (14.8)                              | 287 (15.9)                        | 295 (16.2)            | 227 (15.7)                        | 229 (15.9)                               |
| Antidepressants drugs, n (%)                      | 595 (55.1)                        | 684 (54.6)            | 491 (53.9)                       | 483 (53.0)                              | 531 (29.4)                        | 571 (31.3)            | 438 (30.3)                        | 421 (29.2)                               |
| Benzodiazepines, n (%)                            | 490 (45.4)                        | 584 (46.6)            | 409 (44.9)                       | 417 (45.8)                              | 755 (41.9)                        | 786 (43.1)            | 606 (42.0)                        | 597 (41.3)                               |
| Bisphosphonates, n (%)                            | 52 (4.8)                          | 50 (4.0)              | 38 (4.2)                         | 41 (4.5)                                | 62 (3.4)                          | 52 (2.8)              | 46 (3.2)                          | 47 (3.3)                                 |
| CYP2D6 enzyme Inductors, n (%)                    | 178 (16.5)                        | 228 (18.2)            | 160 (17.6)                       | 153 (16.8)                              | 237 (13.1)                        | 286 (15.7)            | 210 (14.5)                        | 215 (14.9)                               |
| CYP2D6 enzyme Inhibitors, n (%)                   | 479 (44.4)                        | 436 (34.8)            | 365 (40.1)                       | 365 (40.1)                              | 256 (14.2)                        | 303 (16.6)            | 220 (15.2)                        | 218 (15.1)                               |
| Estrogens/hormone therapy, n (%)                  | 134 (12.4)                        | 139 (11.1)            | 102 (11.2)                       | 105 (11.5)                              | 213 (11.8)                        | 185 (10.1)            | 154 (10.7)                        | 154 (10.7)                               |
| <b>Healthcare utilization</b>                     |                                   |                       |                                  |                                         |                                   |                       |                                   |                                          |
| Hospital admission, n (%)                         | 344 (31.9)                        | 426 (34.0)            | 301 (33.0)                       | 298 (32.7)                              | 451 (25.0)                        | 474 (26.0)            | 370 (25.6)                        | 381 (26.4)                               |
| Number of days hospitalized, mean (±SD)           | *                                 | *                     | *                                | *                                       | *                                 | *                     | *                                 | *                                        |
| Number of Medical Practitioner visits, mean (±SD) | 12 (±12)                          | 12 (±12)              | 12 (±12)                         | 12 (±12)                                | *                                 | *                     | *                                 | *                                        |
| Combined comorbidity score, mean (±SD)            | *                                 | *                     | *                                | *                                       | *                                 | *                     | *                                 | *                                        |

<sup>†</sup> Patients with a CYP2D6-inhibiting SSRI were matched on the propensity score to at least 1 and at most 10 patients with another SSRI. A random patient in the other SSRI group was drawn from each matched set to show covariate balance resulting from the matching process.

\* Data suppressed according to CMS' current cell size suppression policy, which stipulates that no cell (e.g. admissions, discharges, patients, services) 10 or less may be displayed.

Cohort 1: Patients were exposed to tamoxifen prior to initiating an SSRI.

Cohort 2: Patients were exposed to an SSRI prior to initiating tamoxifen.

**Table H: Distribution of patient characteristics at baseline from PAAD database**

|                                                   | Cohort 1                         |                      |                                 |                                       | Cohort 2                         |                      |                                 |                                       |
|---------------------------------------------------|----------------------------------|----------------------|---------------------------------|---------------------------------------|----------------------------------|----------------------|---------------------------------|---------------------------------------|
|                                                   | Unmatched                        |                      | Matched (1:10) <sup>†</sup>     |                                       | Unmatched                        |                      | Matched (1:10) <sup>†</sup>     |                                       |
|                                                   | CYP2D6-inhibiting SSRIs<br>n=117 | Other SSRIs<br>n=125 | CYP2D6-inhibiting SSRIs<br>n=79 | Other SSRIs<br>n=79 of 122<br>matched | CYP2D6-inhibiting SSRIs<br>n=135 | Other SSRIs<br>n=136 | CYP2D6-inhibiting SSRIs<br>n=93 | Other SSRIs<br>n=93 of 133<br>matched |
| <b>Demographics</b>                               |                                  |                      |                                 |                                       |                                  |                      |                                 |                                       |
| Age, mean (±SD)                                   | 77 (±10)                         | 78 (±8)              | 77 (±10)                        | 78 (±8)                               | 75 (±11)                         | 75 (±10)             | 76 (±11)                        | 75 (±11)                              |
| Index year, n (%)                                 |                                  |                      |                                 |                                       |                                  |                      |                                 |                                       |
| 1995                                              | *                                | *                    | *                               | *                                     | *                                | *                    | *                               | *                                     |
| 1996                                              | *                                | *                    | *                               | *                                     | 12 (8.9)                         | 15 (11.0)            | *                               | *                                     |
| 1997                                              | 14 (12.0)                        | *                    | *                               | *                                     | 11 (8.1)                         | *                    | *                               | *                                     |
| 1998                                              | 12 (10.3)                        | *                    | *                               | *                                     | *                                | 13 (9.6)             | *                               | *                                     |
| 1999                                              | 11 (9.4)                         | *                    | *                               | *                                     | 13 (9.6)                         | *                    | *                               | *                                     |
| 2000                                              | 16 (13.7)                        | 22 (17.6)            | 14 (17.7)                       | 14 (17.7)                             | 18 (13.3)                        | 15 (11.0)            | 12 (12.9)                       | 13 (14.0)                             |
| 2001                                              | 15 (12.8)                        | 13 (10.4)            | *                               | 11 (13.9)                             | 21 (15.6)                        | 17 (12.5)            | 12 (12.9)                       | *                                     |
| 2002                                              | 14 (12.0)                        | 21 (16.8)            | 11 (13.9)                       | *                                     | 12 (8.9)                         | 15 (11.0)            | *                               | 14 (15.1)                             |
| 2003                                              | *                                | 15 (12.0)            | *                               | *                                     | 12 (8.9)                         | 15 (11.0)            | *                               | *                                     |
| 2004                                              | *                                | *                    | *                               | *                                     | 12 (8.9)                         | 16 (11.8)            | *                               | *                                     |
| 2005                                              | *                                | *                    | *                               | *                                     | *                                | *                    | *                               | *                                     |
| <b>Comorbidities</b>                              |                                  |                      |                                 |                                       |                                  |                      |                                 |                                       |
| Breast cancer, n (%)                              | 84 (71.8)                        | 78 (62.4)            | 54 (68.4)                       | 51 (64.6)                             | 74 (54.8)                        | 79 (58.1)            | 55 (59.1)                       | 53 (57.0)                             |
| Breast cancer site, n (%)                         |                                  |                      |                                 |                                       |                                  |                      |                                 |                                       |
| Nipple and areola                                 |                                  |                      |                                 |                                       |                                  |                      |                                 |                                       |
| Central                                           | 12 (10.3)                        | 12 (9.6)             | *                               | *                                     | 13 (9.6)                         | *                    | *                               | *                                     |
| Upper-inner                                       | 17 (14.5)                        | 19 (15.2)            | 13 (16.5)                       | *                                     | 16 (11.9)                        | 12 (8.8)             | *                               | *                                     |
| Lower-inner                                       | *                                | 11 (8.8)             | *                               | *                                     | *                                | *                    | *                               | *                                     |
| Upper-outer                                       | 12 (10.3)                        | *                    | *                               | *                                     | *                                | *                    | *                               | *                                     |
| Lower-outer                                       | 41 (35.0)                        | 46 (36.8)            | 25 (31.6)                       | 24 (30.4)                             | 29 (21.5)                        | 33 (24.3)            | 22 (23.7)                       | 24 (25.8)                             |
| Auxiliary tail                                    | *                                | 15 (12.0)            | *                               | *                                     | *                                | 13 (9.6)             | *                               | *                                     |
| Other/Unspecified                                 | *                                | *                    | *                               | *                                     | *                                | *                    | *                               | *                                     |
| Other/Unspecified                                 | 104 (88.9)                       | 110 (88.0)           | 69 (87.3)                       | 69 (87.3)                             | 96 (71.1)                        | 100 (73.5)           | 69 (74.2)                       | 68 (73.1)                             |
| Breast cancer stage any time prior to SSRI, n (%) |                                  |                      |                                 |                                       |                                  |                      |                                 |                                       |
| 0                                                 | 36 (30.8)                        | 55 (44.0)            | 28 (35.4)                       | 28 (35.4)                             | 34 (25.2)                        | 37 (27.2)            | 26 (28.0)                       | 23 (24.7)                             |
| I                                                 | 36 (30.8)                        | 53 (42.4)            | 28 (35.4)                       | 28 (35.4)                             | 33 (24.4)                        | 33 (24.3)            | 25 (26.9)                       | 22 (23.7)                             |
| II                                                | *                                | *                    | *                               | *                                     | *                                | *                    | *                               | *                                     |
| III                                               | *                                | *                    | *                               | 79 (100.0)                            | *                                | *                    | *                               | *                                     |
| IV                                                | *                                | 125 (100.0)          | *                               | 79 (100.0)                            | *                                | *                    | *                               | *                                     |
| <b>Procedures</b>                                 |                                  |                      |                                 |                                       |                                  |                      |                                 |                                       |
| Chemotherapy, n (%)                               | *                                | *                    | *                               | *                                     | 22 (16.3)                        | *                    | *                               | *                                     |
| Mammography, n (%)                                | 45 (38.5)                        | 47 (37.6)            | 26 (32.9)                       | 34 (43.0)                             | 42 (31.1)                        | 45 (33.1)            | 30 (32.3)                       | 28 (30.1)                             |
| Mastectomy, n (%)                                 | 81 (69.2)                        | 85 (68.0)            | 56 (70.9)                       | 54 (68.4)                             | 53 (39.3)                        | 60 (44.1)            | 40 (43.0)                       | 39 (41.9)                             |
| Radiation, n (%)                                  | 37 (31.6)                        | 33 (26.4)            | 23 (29.1)                       | 22 (27.8)                             | 20 (14.8)                        | 16 (11.8)            | 11 (11.8)                       | 13 (14.0)                             |
| <b>Medication utilization</b>                     |                                  |                      |                                 |                                       |                                  |                      |                                 |                                       |

|                                                     | Cohort 1                         |                      |                                 |                                       | Cohort 2                         |                      |                                 |                                       |
|-----------------------------------------------------|----------------------------------|----------------------|---------------------------------|---------------------------------------|----------------------------------|----------------------|---------------------------------|---------------------------------------|
|                                                     | Unmatched                        |                      | Matched (1:10) <sup>†</sup>     |                                       | Unmatched                        |                      | Matched (1:10) <sup>†</sup>     |                                       |
|                                                     | CYP2D6-inhibiting SSRIs<br>n=117 | Other SSRIs<br>n=125 | CYP2D6-inhibiting SSRIs<br>n=79 | Other SSRIs<br>n=79 of 122<br>matched | CYP2D6-inhibiting SSRIs<br>n=135 | Other SSRIs<br>n=136 | CYP2D6-inhibiting SSRIs<br>n=93 | Other SSRIs<br>n=93 of 133<br>matched |
| Pre-SSRI tamoxifen total days of supply, mean (±SD) | 319 (±359)                       | 396 (±489)           | 354 (±385)                      | 370 (±468)                            | -                                | -                    | -                               | -                                     |
| Pre-tamoxifen SSRI days of supply, mean (±SD)       | -                                | -                    | -                               | -                                     | 32 (±84)                         | 23 (±44)             | 21 (±22)                        | 28 (±52)                              |
| Number of generics, mean (±SD)                      | 15 (±8)                          | 15 (±10)             | 15 (±9)                         | 14 (±9)                               | *                                | *                    | *                               | *                                     |
| Vaccine, n (%)                                      | 33 (28.2)                        | 37 (29.6)            | 22 (27.8)                       | 23 (29.1)                             | 11 (8.1)                         | 18 (13.2)            | 11 (11.8)                       | *                                     |
| Anticoagulants, n (%)                               | 14 (12.0)                        | 16 (12.8)            | *                               | *                                     | 12 (8.9)                         | *                    | *                               | *                                     |
| Antiplatelets, n (%)                                | *                                | *                    | *                               | *                                     | *                                | *                    | *                               | *                                     |
| Antipsychotics, n (%)                               | *                                | *                    | *                               | *                                     | *                                | 14 (10.3)            | *                               | 11 (11.8)                             |
| Angiotensin converting enzyme-inhibitors, n (%)     | 30 (25.6)                        | 37 (29.6)            | 20 (25.3)                       | 19 (24.1)                             | 29 (21.5)                        | 29 (21.3)            | 22 (23.7)                       | 22 (23.7)                             |
| Angiotensin receptor blockers, n (%)                | 17 (14.5)                        | 22 (17.6)            | 12 (15.2)                       | *                                     | 22 (16.3)                        | 18 (13.2)            | 12 (12.9)                       | 11 (11.8)                             |
| Beta-blockers, n (%)                                | 48 (41.0)                        | 47 (37.6)            | 31 (39.2)                       | 27 (34.2)                             | 35 (25.9)                        | 39 (28.7)            | 24 (25.8)                       | 27 (29.0)                             |
| Calcium channel blockers, n (%)                     | 45 (38.5)                        | 55 (44.0)            | 32 (40.5)                       | 34 (43.0)                             | 47 (34.8)                        | 46 (33.8)            | 33 (35.5)                       | 33 (35.5)                             |
| Diuretics, n (%)                                    | 50 (42.7)                        | 52 (41.6)            | 36 (45.6)                       | 33 (41.8)                             | 32 (23.7)                        | 33 (24.3)            | 21 (22.6)                       | 21 (22.6)                             |
| Satins, n (%)                                       | 26 (22.2)                        | 30 (24.0)            | 16 (20.3)                       | 19 (24.1)                             | 22 (16.3)                        | 32 (23.5)            | 20 (21.5)                       | 19 (20.4)                             |
| Antidepressants drugs, n (%)                        | 41 (35.0)                        | 41 (32.8)            | 25 (31.6)                       | 31 (39.2)                             | 11 (8.1)                         | 14 (10.3)            | *                               | *                                     |
| Benzodiazepines, n (%)                              | 69 (59.0)                        | 52 (41.6)            | 44 (55.7)                       | 42 (53.2)                             | 53 (39.3)                        | 54 (39.7)            | 37 (39.8)                       | 35 (37.6)                             |
| Bisphosphonates, n (%)                              | *                                | *                    | *                               | *                                     | *                                | 12 (8.8)             | *                               | *                                     |
| CYP2D6 enzyme Inductors, n (%)                      | *                                | *                    | *                               | *                                     | *                                | *                    | *                               | *                                     |
| CYP2D6 enzyme Inhibitors, n (%)                     | 31 (26.5)                        | 30 (24.0)            | 18 (22.8)                       | 21 (26.6)                             | *                                | *                    | *                               | *                                     |
| Estrogens/hormone therapy, n (%)                    | 19 (16.2)                        | 17 (13.6)            | *                               | 13 (16.5)                             | 12 (8.9)                         | *                    | *                               | *                                     |
| <b>Healthcare utilization</b>                       |                                  |                      |                                 |                                       |                                  |                      |                                 |                                       |
| Hospital admission, n (%)                           | 71 (60.7)                        | 69 (55.2)            | 46 (58.2)                       | 44 (55.7)                             | 53 (39.3)                        | 58 (42.6)            | 39 (41.9)                       | 37 (39.8)                             |
| Number of days hospitalized, mean (±SD)             | *                                | *                    | *                               | *                                     | *                                | *                    | *                               | *                                     |
| Number of Medical Practitioner visits, mean (±SD)   | 19 (±20)                         | 22 (±29)             | 20 (±23)                        | 20 (±23)                              | *                                | *                    | *                               | *                                     |
| Combined comorbidity score, mean (±SD)              | *                                | *                    | *                               | *                                     | *                                | *                    | *                               | *                                     |

<sup>†</sup> Patients with a CYP2D6-inhibiting SSRI were matched on the propensity score to at least 1 and at most 10 patients with another SSRI. A random patient in the other SSRI group was drawn from each matched set to show covariate balance resulting from the matching process.

\* Data suppressed according to CMS' current cell size suppression policy, which stipulates that no cell (e.g. admissions, discharges, patients, services) 10 or less may be displayed.

Cohort 1: Patients were exposed to tamoxifen prior to initiating an SSRI.

Cohort 2: Patients were exposed to an SSRI prior to initiating tamoxifen.

**Table I: Distribution of patient characteristics at baseline from PACE database**

|                                                   | Cohort 1                         |                      |                                  |                                        | Cohort 2                         |                      |                                  |                                        |
|---------------------------------------------------|----------------------------------|----------------------|----------------------------------|----------------------------------------|----------------------------------|----------------------|----------------------------------|----------------------------------------|
|                                                   | Unmatched                        |                      | Matched (1:10) <sup>†</sup>      |                                        | Unmatched                        |                      | Matched (1:10) <sup>†</sup>      |                                        |
|                                                   | CYP2D6-inhibiting SSRIs<br>n=267 | Other SSRIs<br>n=381 | CYP2D6-inhibiting SSRIs<br>n=249 | Other SSRIs<br>n=249 of 375<br>matched | CYP2D6-inhibiting SSRIs<br>n=241 | Other SSRIs<br>n=238 | CYP2D6-inhibiting SSRIs<br>n=174 | Other SSRIs<br>n=174 of 236<br>matched |
| <b>Demographics</b>                               |                                  |                      |                                  |                                        |                                  |                      |                                  |                                        |
| Age, mean (±SD)                                   | 79 (±7)                          | 79 (±6)              | 79 (±7)                          | 79 (±6)                                | 78 (±7)                          | 79 (±7)              | 78 (±7)                          | 79 (±7)                                |
| Index year, n (%)                                 |                                  |                      |                                  |                                        |                                  |                      |                                  |                                        |
| 1995                                              | 78 (29.2)                        | 109 (28.6)           | 75 (30.1)                        | 71 (28.5)                              | 71 (29.5)                        | 64 (26.9)            | 53 (30.5)                        | 50 (28.7)                              |
| 1996                                              | 36 (13.5)                        | 52 (13.6)            | 34 (13.7)                        | 33 (13.3)                              | 16 (6.6)                         | 18 (7.6)             | 13 (7.5)                         | 13 (7.5)                               |
| 1997                                              | 29 (10.9)                        | 35 (9.2)             | 26 (10.4)                        | 28 (11.2)                              | 19 (7.9)                         | 23 (9.7)             | 13 (7.5)                         | 15 (8.6)                               |
| 1998                                              | 33 (12.4)                        | 28 (7.3)             | 27 (10.8)                        | 25 (10.0)                              | 28 (11.6)                        | 11 (4.6)             | 12 (6.9)                         | 11 (6.3)                               |
| 1999                                              | 24 (9.0)                         | 30 (7.9)             | 22 (8.8)                         | 26 (10.4)                              | 20 (8.3)                         | 22 (9.2)             | 17 (9.8)                         | 15 (8.6)                               |
| 2000                                              | 17 (6.4)                         | 26 (6.8)             | 16 (6.4)                         | 12 (4.8)                               | 21 (8.7)                         | 12 (5.0)             | 14 (8.0)                         | 12 (6.9)                               |
| 2001                                              | 21 (7.9)                         | 35 (9.2)             | 21 (8.4)                         | 22 (8.8)                               | 19 (7.9)                         | 25 (10.5)            | 15 (8.6)                         | 16 (9.2)                               |
| 2002                                              | 16 (6.0)                         | 23 (6.0)             | 15 (6.0)                         | 17 (6.8)                               | 17 (7.1)                         | 17 (7.1)             | 12 (6.9)                         | 16 (9.2)                               |
| 2003                                              | *                                | 17 (4.5)             | *                                | *                                      | 13 (5.4)                         | 19 (8.0)             | 12 (6.9)                         | 15 (8.6)                               |
| 2004                                              | *                                | *                    | *                                | *                                      | *                                | 14 (5.9)             | *                                | *                                      |
| 2005                                              | *                                | 18 (4.7)             | *                                | *                                      | *                                | 13 (5.5)             | *                                | *                                      |
| <b>Comorbidities</b>                              |                                  |                      |                                  |                                        |                                  |                      |                                  |                                        |
| Breast cancer, n (%)                              | 133 (49.8)                       | 180 (47.2)           | 119 (47.8)                       | 122 (49.0)                             | 108 (44.8)                       | 101 (42.4)           | 79 (45.4)                        | 75 (43.1)                              |
| Breast cancer site, n (%)                         |                                  |                      |                                  |                                        |                                  |                      |                                  |                                        |
| Nipple and areola                                 | 25 (9.4)                         | 29 (7.6)             | 19 (7.6)                         | 21 (8.4)                               | 11 (4.6)                         | 13 (5.5)             | *                                | *                                      |
| Central                                           | 35 (13.1)                        | 58 (15.2)            | 35 (14.1)                        | 37 (14.9)                              | 27 (11.2)                        | 26 (10.9)            | 20 (11.5)                        | 18 (10.3)                              |
| Upper-inner                                       | 13 (4.9)                         | 21 (5.5)             | 13 (5.2)                         | 14 (5.6)                               | 17 (7.1)                         | 18 (7.6)             | 12 (6.9)                         | 11 (6.3)                               |
| Lower-inner                                       | 18 (6.7)                         | 21 (5.5)             | 13 (5.2)                         | 16 (6.4)                               | *                                | *                    | *                                | *                                      |
| Upper-outer                                       | 88 (33.0)                        | 112 (29.4)           | 79 (31.7)                        | 78 (31.3)                              | 51 (21.2)                        | 60 (25.2)            | 38 (21.8)                        | 36 (20.7)                              |
| Lower-outer                                       | 19 (7.1)                         | 26 (6.8)             | 18 (7.2)                         | 17 (6.8)                               | 13 (5.4)                         | *                    | *                                | *                                      |
| Auxiliary tail                                    | *                                | *                    | *                                | *                                      | *                                | *                    | *                                | *                                      |
| Other/Unspecified                                 | 238 (89.1)                       | 330 (86.6)           | 220 (88.4)                       | 216 (86.7)                             | 184 (76.3)                       | 176 (73.9)           | 134 (77.0)                       | 130 (74.7)                             |
| Breast cancer stage any time prior to SSRI, n (%) |                                  |                      |                                  |                                        |                                  |                      |                                  |                                        |
| 0                                                 | 55 (20.6)                        | 91 (23.9)            | 52 (20.9)                        | 56 (22.5)                              | 42 (17.4)                        | 42 (17.6)            | 30 (17.2)                        | 27 (15.5)                              |
| I                                                 | 54 (20.2)                        | 90 (23.6)            | 51 (20.5)                        | 55 (22.1)                              | 42 (17.4)                        | 40 (16.8)            | 30 (17.2)                        | 27 (15.5)                              |
| II                                                | 11 (4.1)                         | 24 (6.3)             | 11 (4.4)                         | 14 (5.6)                               | *                                | *                    | *                                | *                                      |
| III                                               | *                                | *                    | *                                | 249 (100.0)                            | *                                | *                    | *                                | *                                      |
| IV                                                | *                                | *                    | *                                | 249 (100.0)                            | *                                | *                    | *                                | *                                      |
| <b>Procedures</b>                                 |                                  |                      |                                  |                                        |                                  |                      |                                  |                                        |
| Chemotherapy, n (%)                               | *                                | 13 (3.4)             | *                                | 11 (4.4)                               | 13 (5.4)                         | *                    | *                                | *                                      |
| Mammography, n (%)                                | 67 (25.1)                        | 106 (27.8)           | 64 (25.7)                        | 66 (26.5)                              | 73 (30.3)                        | 63 (26.5)            | 50 (28.7)                        | 49 (28.2)                              |
| Mastectomy, n (%)                                 | 116 (43.4)                       | 169 (44.4)           | 104 (41.8)                       | 110 (44.2)                             | 80 (33.2)                        | 82 (34.5)            | 53 (30.5)                        | 55 (31.6)                              |
| Radiation, n (%)                                  | 63 (23.6)                        | 95 (24.9)            | 61 (24.5)                        | 60 (24.1)                              | 26 (10.8)                        | 31 (13.0)            | 19 (10.9)                        | 19 (10.9)                              |
| <b>Medication utilization</b>                     |                                  |                      |                                  |                                        |                                  |                      |                                  |                                        |

|                                                     | Cohort 1                         |                      |                                  |                                         | Cohort 2                         |                      |                                  |                                        |
|-----------------------------------------------------|----------------------------------|----------------------|----------------------------------|-----------------------------------------|----------------------------------|----------------------|----------------------------------|----------------------------------------|
|                                                     | Unmatched                        |                      | Matched (1:10) <sup>†</sup>      |                                         | Unmatched                        |                      | Matched (1:10) <sup>†</sup>      |                                        |
|                                                     | CYP2D6-inhibiting SSRIs<br>n=267 | Other SSRIs<br>n=381 | CYP2D6-inhibiting SSRIs<br>n=249 | Other SSRIs<br>n= 249 of 375<br>matched | CYP2D6-inhibiting SSRIs<br>n=241 | Other SSRIs<br>n=238 | CYP2D6-inhibiting SSRIs<br>n=174 | Other SSRIs<br>n=174 of 236<br>matched |
| Pre-SSRI tamoxifen total days of supply, mean (±SD) | 287 (±353)                       | 311 (±400)           | 279 (±342)                       | 287 (±343)                              | -                                | -                    | -                                | -                                      |
| Pre-tamoxifen SSRI days of supply, mean (±SD)       | -                                | -                    | -                                | -                                       | 13 (±10)                         | 13 (±10)             | 13 (±10)                         | 12 (±10)                               |
| Number of generics, mean (±SD)                      | 12 (±6)                          | 12 (±7)              | 12 (±6)                          | 12 (±6)                                 | *                                | *                    | *                                | *                                      |
| Vaccine, n (%)                                      | 45 (16.9)                        | 75 (19.7)            | 42 (16.9)                        | 43 (17.3)                               | 24 (10.0)                        | 22 (9.2)             | 16 (9.2)                         | 19 (10.9)                              |
| Anticoagulants, n (%)                               | 28 (10.5)                        | 53 (13.9)            | 27 (10.8)                        | 25 (10.0)                               | 24 (10.0)                        | 33 (13.9)            | 21 (12.1)                        | 17 (9.8)                               |
| Antiplatelets, n (%)                                | 11 (4.1)                         | 17 (4.5)             | 11 (4.4)                         | *                                       | *                                | *                    | *                                | *                                      |
| Antipsychotics, n (%)                               | 23 (8.6)                         | 28 (7.3)             | 21 (8.4)                         | 24 (9.6)                                | 12 (5.0)                         | 22 (9.2)             | 11 (6.3)                         | 14 (8.0)                               |
| Angiotensin converting enzyme-inhibitors, n (%)     | 68 (25.5)                        | 112 (29.4)           | 67 (26.9)                        | 69 (27.7)                               | 67 (27.8)                        | 62 (26.1)            | 47 (27.0)                        | 48 (27.6)                              |
| Angiotensin receptor blockers, n (%)                | 15 (5.6)                         | 36 (9.4)             | 15 (6.0)                         | 17 (6.8)                                | *                                | 17 (7.1)             | *                                | *                                      |
| Beta-blockers, n (%)                                | 83 (31.1)                        | 122 (32.0)           | 80 (32.1)                        | 74 (29.7)                               | 60 (24.9)                        | 67 (28.2)            | 50 (28.7)                        | 47 (27.0)                              |
| Calcium channel blockers, n (%)                     | 97 (36.3)                        | 159 (41.7)           | 95 (38.2)                        | 91 (36.5)                               | 86 (35.7)                        | 77 (32.4)            | 59 (33.9)                        | 60 (34.5)                              |
| Diuretics, n (%)                                    | 51 (19.1)                        | 107 (28.1)           | 49 (19.7)                        | 45 (18.1)                               | 60 (24.9)                        | 61 (25.6)            | 45 (25.9)                        | 43 (24.7)                              |
| Satins, n (%)                                       | 31 (11.6)                        | 64 (16.8)            | 31 (12.4)                        | 28 (11.2)                               | 31 (12.9)                        | 40 (16.8)            | 24 (13.8)                        | 23 (13.2)                              |
| Antidepressants drugs, n (%)                        | 99 (37.1)                        | 130 (34.1)           | 89 (35.7)                        | 82 (32.9)                               | 28 (11.6)                        | 21 (8.8)             | 18 (10.3)                        | 20 (11.5)                              |
| Benzodiazepines, n (%)                              | 138 (51.7)                       | 160 (42.0)           | 125 (50.2)                       | 124 (49.8)                              | 98 (40.7)                        | 80 (33.6)            | 67 (38.5)                        | 64 (36.8)                              |
| Bisphosphonates, n (%)                              | 21 (7.9)                         | 40 (10.5)            | 21 (8.4)                         | 21 (8.4)                                | 11 (4.6)                         | *                    | *                                | *                                      |
| CYP2D6 enzyme Inductors, n (%)                      | *                                | *                    | *                                | *                                       | *                                | *                    | *                                | *                                      |
| CYP2D6 enzyme Inhibitors, n (%)                     | 83 (31.1)                        | 102 (26.8)           | 74 (29.7)                        | 73 (29.3)                               | 18 (7.5)                         | 13 (5.5)             | 11 (6.3)                         | 12 (6.9)                               |
| Estrogens/hormone therapy, n (%)                    | 32 (12.0)                        | 40 (10.5)            | 30 (12.0)                        | 26 (10.4)                               | 22 (9.1)                         | 25 (10.5)            | 16 (9.2)                         | 13 (7.5)                               |
| <b>Healthcare utilization</b>                       |                                  |                      |                                  |                                         |                                  |                      |                                  |                                        |
| Hospital admission, n (%)                           | 144 (53.9)                       | 223 (58.5)           | 136 (54.6)                       | 135 (54.2)                              | 96 (39.8)                        | 109 (45.8)           | 76 (43.7)                        | 74 (42.5)                              |
| Number of days hospitalized, mean (±SD)             | *                                | *                    | *                                | *                                       | *                                | *                    | *                                | *                                      |
| Number of Medical Practitioner visits, mean (±SD)   | 15 (±15)                         | 16 (±16)             | 15 (±15)                         | 15 (±15)                                | *                                | *                    | *                                | *                                      |
| Combined comorbidity score, mean (±SD)              | *                                | *                    | *                                | *                                       | *                                | *                    | *                                | *                                      |

<sup>†</sup> Patients with a CYP2D6-inhibiting SSRI were matched on the propensity score to at least 1 and at most 10 patients with another SSRI. A random patient in the other SSRI group was drawn from each matched set to show covariate balance resulting from the matching process.

\* Data suppressed according to CMS' current cell size suppression policy, which stipulates that no cell (e.g. admissions, discharges, patients, services) 10 or less may be displayed.

Cohort 1: Patients were exposed to tamoxifen prior to initiating an SSRI.

Cohort 2: Patients were exposed to an SSRI prior to initiating tamoxifen.

**Table J: Distribution of patient characteristics at baseline from Optum Research database**

|                                                   | Cohort 1                         |                       |                                  |                              | Cohort 2                          |                       |                                   |                                          |
|---------------------------------------------------|----------------------------------|-----------------------|----------------------------------|------------------------------|-----------------------------------|-----------------------|-----------------------------------|------------------------------------------|
|                                                   | Unmatched                        |                       | Matched (1:10) <sup>†</sup>      |                              | Unmatched                         |                       | Matched (1:10) <sup>†</sup>       |                                          |
|                                                   | CYP2D6-inhibiting SSRIs<br>n=745 | Other SSRIs<br>n=1899 | CYP2D6-inhibiting SSRIs<br>n=740 | Other SSRIs<br>n=740 of 1898 | CYP2D6-inhibiting SSRIs<br>n=1224 | Other SSRIs<br>n=2529 | CYP2D6-inhibiting SSRIs<br>n=1209 | Other SSRIs<br>n=1209 of 2528<br>matched |
| <b>Demographics</b>                               |                                  |                       |                                  |                              |                                   |                       |                                   |                                          |
| Age, mean (±SD)                                   | 54 (±10)                         | 51 (±10)              | 54 (±10)                         | 53 (±10)                     | 53 (±10)                          | 51 (±10)              | 53 (±10)                          | 52 (±10)                                 |
| Index year, n (%)                                 |                                  |                       |                                  |                              |                                   |                       |                                   |                                          |
| 2004                                              | 390 (52.3)                       | 579 (30.5)            | 387 (52.3)                       | 379 (51.2)                   | 584 (47.7)                        | 665 (26.3)            | 564 (46.7)                        | 563 (46.6)                               |
| 2005                                              | 62 (8.3)                         | 156 (8.2)             | 60 (8.1)                         | 63 (8.5)                     | 103 (8.4)                         | 183 (7.2)             | 102 (8.4)                         | 96 (7.9)                                 |
| 2006                                              | 51 (6.8)                         | 144 (7.6)             | 51 (6.9)                         | 47 (6.4)                     | 82 (6.7)                          | 196 (7.8)             | 84 (6.9)                          | 93 (7.7)                                 |
| 2007                                              | 53 (7.1)                         | 150 (7.9)             | 53 (7.2)                         | 54 (7.3)                     | 75 (6.1)                          | 209 (8.3)             | 78 (6.5)                          | 83 (6.9)                                 |
| 2008                                              | 43 (5.8)                         | 161 (8.5)             | 43 (5.8)                         | 53 (7.2)                     | 88 (7.2)                          | 228 (9.0)             | 88 (7.3)                          | 80 (6.6)                                 |
| 2009                                              | 34 (4.6)                         | 143 (7.5)             | 34 (4.6)                         | 34 (4.6)                     | 64 (5.2)                          | 242 (9.6)             | 62 (5.1)                          | 60 (5.0)                                 |
| 2010                                              | 25 (3.4)                         | 129 (6.8)             | 25 (3.4)                         | 23 (3.1)                     | 50 (4.1)                          | 190 (7.5)             | 50 (4.1)                          | 63 (5.2)                                 |
| 2011                                              | 32 (4.3)                         | 142 (7.5)             | 32 (4.3)                         | 37 (5.0)                     | 57 (4.7)                          | 209 (8.3)             | 57 (4.7)                          | 44 (3.6)                                 |
| 2012                                              | 27 (3.6)                         | 151 (8.0)             | 27 (3.6)                         | 23 (3.1)                     | 67 (5.5)                          | 201 (7.9)             | 66 (5.5)                          | 73 (6.0)                                 |
| 2013                                              | 28 (3.8)                         | 144 (7.6)             | 28 (3.8)                         | 27 (3.6)                     | 54 (4.4)                          | 206 (8.1)             | 58 (4.8)                          | 54 (4.5)                                 |
| <b>Comorbidities</b>                              |                                  |                       |                                  |                              |                                   |                       |                                   |                                          |
| Breast cancer, n (%)                              | 294 (39.5)                       | 1044 (55.0)           | 293 (39.6)                       | 301 (40.7)                   | 562 (45.9)                        | 1392 (55.0)           | 555 (45.9)                        | 572 (47.3)                               |
| Breast cancer site, n (%)                         |                                  |                       |                                  |                              |                                   |                       |                                   |                                          |
| Nipple and areola                                 | 31 (4.2)                         | 96 (5.1)              | 31 (4.2)                         | 32 (4.3)                     | 45 (3.7)                          | 92 (3.6)              | 44 (3.6)                          | 40 (3.3)                                 |
| Central                                           | 53 (7.1)                         | 238 (12.5)            | 53 (7.2)                         | 63 (8.5)                     | 90 (7.4)                          | 269 (10.6)            | 89 (7.4)                          | 90 (7.4)                                 |
| Upper-inner                                       | 50 (6.7)                         | 226 (11.9)            | 50 (6.8)                         | 50 (6.8)                     | 70 (5.7)                          | 255 (10.1)            | 70 (5.8)                          | 74 (6.1)                                 |
| Lower-inner                                       | 35 (4.7)                         | 109 (5.7)             | 35 (4.7)                         | 34 (4.6)                     | 54 (4.4)                          | 137 (5.4)             | 54 (4.5)                          | 58 (4.8)                                 |
| Upper-outer                                       | 195 (26.2)                       | 703 (37.0)            | 195 (26.4)                       | 205 (27.7)                   | 297 (24.3)                        | 831 (32.9)            | 296 (24.5)                        | 306 (25.3)                               |
| Lower-outer                                       | 42 (5.6)                         | 175 (9.2)             | 42 (5.7)                         | 40 (5.4)                     | 62 (5.1)                          | 206 (8.1)             | 62 (5.1)                          | 67 (5.5)                                 |
| Auxiliary tail                                    | 5 (0.7)                          | 25 (1.3)              | 5 (0.7)                          | 6 (0.8)                      | 18 (1.5)                          | 32 (1.3)              | 16 (1.3)                          | 17 (1.4)                                 |
| Other/Unspecified                                 | 484 (65.0)                       | 1500 (79.0)           | 482 (65.1)                       | 486 (65.7)                   | 677 (55.3)                        | 1741 (68.8)           | 670 (55.4)                        | 690 (57.1)                               |
| Breast cancer stage any time prior to SSRI, n (%) |                                  |                       |                                  |                              |                                   |                       |                                   |                                          |
| 0                                                 | 206 (27.7)                       | 782 (41.2)            | 204 (27.6)                       | 224 (30.3)                   | 341 (27.9)                        | 914 (36.1)            | 337 (27.9)                        | 345 (28.5)                               |
| I                                                 | 195 (26.2)                       | 757 (39.9)            | 193 (26.1)                       | 215 (29.1)                   | 320 (26.1)                        | 865 (34.2)            | 316 (26.1)                        | 327 (27.0)                               |
| II                                                | 30 (4.0)                         | 144 (7.6)             | 30 (4.1)                         | 33 (4.5)                     | 59 (4.8)                          | 191 (7.6)             | 58 (4.8)                          | 53 (4.4)                                 |
| III                                               | 1 (0.1)                          | 4 (0.2)               | 1 (0.1)                          | 1 (0.1)                      | 2 (0.2)                           | 3 (0.1)               | 2 (0.2)                           | 1 (0.1)                                  |
| IV                                                | 1 (0.1)                          | 3 (0.2)               | 1 (0.1)                          | 1 (0.1)                      | 1 (0.1)                           | 2 (0.1)               | 1 (0.1)                           | 0 (0)                                    |
| <b>Procedures</b>                                 |                                  |                       |                                  |                              |                                   |                       |                                   |                                          |
| Chemotherapy, n (%)                               | 102 (13.7)                       | 388 (20.4)            | 102 (13.8)                       | 105 (14.2)                   | 188 (15.4)                        | 514 (20.3)            | 185 (15.3)                        | 191 (15.8)                               |
| Mammography, n (%)                                | 311 (41.7)                       | 1083 (57.0)           | 308 (41.6)                       | 319 (43.1)                   | 534 (43.6)                        | 1481 (58.6)           | 532 (44.0)                        | 539 (44.6)                               |
| Mastectomy, n (%)                                 | 230 (30.9)                       | 968 (51.0)            | 230 (31.1)                       | 234 (31.6)                   | 248 (20.3)                        | 820 (32.4)            | 411 (34.0)                        | 418 (34.6)                               |
| Radiation, n (%)                                  | 184 (24.7)                       | 671 (35.3)            | 182 (24.6)                       | 189 (25.5)                   | 242 (19.8)                        | 686 (27.1)            | 241 (19.9)                        | 255 (21.1)                               |
| <b>Medication utilization</b>                     |                                  |                       |                                  |                              |                                   |                       |                                   |                                          |

|                                                     | Cohort 1                         |                       |                                  |                              | Cohort 2                          |                       |                                   |                                          |
|-----------------------------------------------------|----------------------------------|-----------------------|----------------------------------|------------------------------|-----------------------------------|-----------------------|-----------------------------------|------------------------------------------|
|                                                     | Unmatched                        |                       | Matched (1:10) <sup>†</sup>      |                              | Unmatched                         |                       | Matched (1:10) <sup>†</sup>       |                                          |
|                                                     | CYP2D6-inhibiting SSRIs<br>n=745 | Other SSRIs<br>n=1899 | CYP2D6-inhibiting SSRIs<br>n=740 | Other SSRIs<br>n=740 of 1898 | CYP2D6-inhibiting SSRIs<br>n=1224 | Other SSRIs<br>n=2529 | CYP2D6-inhibiting SSRIs<br>n=1209 | Other SSRIs<br>n=1209 of 2528<br>matched |
| Pre-SSRI tamoxifen total days of supply, mean (±SD) | 113 (±149)                       | 151 (±204)            | 113 (±149)                       | 111 (±139)                   | -                                 | -                     | -                                 | -                                        |
| Pre-tamoxifen SSRI days of supply, mean (±SD)       | -                                | -                     | -                                | -                            | 17 (±18)                          | 19 (±20)              | 17 (±18)                          | 17 (±20)                                 |
| Number of generics, mean (±SD)                      | 8 (±6)                           | 9 (±6)                | 8 (±6)                           | 8 (±6)                       | 5 (±5)                            | 7 (±5)                | 5 (±5)                            | 5 (±5)                                   |
| Vaccine, n (%)                                      | 75 (10.1)                        | 240 (12.6)            | 75 (10.1)                        | 81 (10.9)                    | 80 (6.5)                          | 209 (8.3)             | 79 (6.5)                          | 80 (6.6)                                 |
| Anticoagulants, n (%)                               | 35 (4.7)                         | 94 (4.9)              | 35 (4.7)                         | 30 (4.1)                     | 38 (3.1)                          | 103 (4.1)             | 38 (3.1)                          | 34 (2.8)                                 |
| Antiplatelets, n (%)                                | 6 (0.8)                          | 19 (1.0)              | 6 (0.8)                          | 4 (0.5)                      | 8 (0.7)                           | 19 (0.8)              | 8 (0.7)                           | 7 (0.6)                                  |
| Antipsychotics, n (%)                               | 17 (2.3)                         | 54 (2.8)              | 16 (2.2)                         | 17 (2.3)                     | 25 (2.0)                          | 60 (2.4)              | 25 (2.1)                          | 24 (2.0)                                 |
| Angiotensin converting enzyme-inhibitors, n (%)     | 95 (12.8)                        | 162 (8.5)             | 92 (12.4)                        | 89 (12.0)                    | 125 (10.2)                        | 214 (8.5)             | 118 (9.8)                         | 127 (10.5)                               |
| Angiotensin receptor blockers, n (%)                | 62 (8.3)                         | 137 (7.2)             | 61 (8.2)                         | 67 (9.1)                     | 71 (5.8)                          | 156 (6.2)             | 71 (5.9)                          | 74 (6.1)                                 |
| Beta-blockers, n (%)                                | 98 (13.2)                        | 198 (10.4)            | 96 (13.0)                        | 78 (10.5)                    | 154 (12.6)                        | 260 (10.3)            | 144 (11.9)                        | 145 (12.0)                               |
| Calcium channel blockers, n (%)                     | 57 (7.7)                         | 128 (6.7)             | 57 (7.7)                         | 50 (6.8)                     | 66 (5.4)                          | 141 (5.6)             | 66 (5.5)                          | 65 (5.4)                                 |
| Diuretics, n (%)                                    | 80 (10.7)                        | 185 (9.7)             | 78 (10.5)                        | 73 (9.9)                     | 104 (8.5)                         | 193 (7.6)             | 96 (7.9)                          | 91 (7.5)                                 |
| Satins, n (%)                                       | 106 (14.2)                       | 241 (12.7)            | 105 (14.2)                       | 93 (12.6)                    | 166 (13.6)                        | 333 (13.2)            | 159 (13.2)                        | 168 (13.9)                               |
| Antidepressants drugs, n (%)                        | 282 (37.9)                       | 787 (41.4)            | 278 (37.6)                       | 268 (36.2)                   | 171 (14.0)                        | 362 (14.3)            | 168 (13.9)                        | 173 (14.3)                               |
| Benzodiazepines, n (%)                              | 233 (31.3)                       | 817 (43.0)            | 233 (31.5)                       | 232 (31.4)                   | 354 (28.9)                        | 902 (35.7)            | 352 (29.1)                        | 371 (30.7)                               |
| Bisphosphonates, n (%)                              | 38 (5.1)                         | 131 (6.9)             | 38 (5.1)                         | 36 (4.9)                     | 59 (4.8)                          | 104 (4.1)             | 58 (4.8)                          | 59 (4.9)                                 |
| CYP2D6 enzyme Inductors, n (%)                      | 74 (9.9)                         | 288 (15.2)            | 74 (10.0)                        | 75 (10.1)                    | 132 (10.8)                        | 390 (15.4)            | 129 (10.7)                        | 134 (11.1)                               |
| CYP2D6 enzyme Inhibitors, n (%)                     | 218 (29.3)                       | 435 (22.9)            | 214 (28.9)                       | 210 (28.4)                   | 110 (9.0)                         | 338 (13.4)            | 110 (9.1)                         | 127 (10.5)                               |
| Estrogens/hormone therapy, n (%)                    | 71 (9.5)                         | 182 (9.6)             | 69 (9.3)                         | 67 (9.1)                     | 85 (6.9)                          | 231 (9.1)             | 85 (7.0)                          | 83 (6.9)                                 |
| <b>Healthcare utilization</b>                       |                                  |                       |                                  |                              |                                   |                       |                                   |                                          |
| Hospital admission, n (%)                           | 118 (15.8)                       | 400 (21.1)            | 117 (15.8)                       | 117 (15.8)                   | 133 (10.9)                        | 392 (15.5)            | 133 (11.0)                        | 125 (10.3)                               |
| Number of days hospitalized, mean (±SD)             | 1 (±3)                           | 1 (±5)                | 1 (±3)                           | 1 (±5)                       | 1 (±2)                            | 1 (±5)                | 1 (±2)                            | 0 (±2)                                   |
| Number of Medical Practitioner visits, mean (±SD)   | 8 (±10)                          | 12 (±11)              | 8 (±10)                          | 9 (±9)                       | 5 (±6)                            | 7 (±6)                | 5 (±6)                            | 5 (±6)                                   |
| Combined comorbidity score, mean (±SD)              | 2 (±2)                           | 2 (±2)                | 2 (±2)                           | 1 (±2)                       | 1 (±2)                            | 2 (±2)                | 1 (±2)                            | 1 (±2)                                   |

<sup>†</sup> Patients with a CYP2D6-inhibiting SSRI were matched on the propensity score to at least 1 and at most 10 patients with another SSRI. A random patient in the other SSRI group was drawn from each matched set to show covariate balance resulting from the matching process.

\* Data suppressed according to CMS' current cell size suppression policy, which stipulates that no cell (e.g. admissions, discharges, patients, services) 10 or less may be displayed.

Cohort 1: Patients were exposed to tamoxifen prior to initiating an SSRI.

Cohort 2: Patients were exposed to an SSRI prior to initiating tamoxifen
